1 **Metatranscriptomics reveals a shift in microbial community composition and**  
2 **function during summer months in a coastal marine environment**

3

4 Ben J. G. Sutherland<sup>1,2,3\*†</sup>, Jan F. Finke<sup>2,4\*†</sup>, Robert Saunders<sup>5</sup>, Snehal Warne<sup>5</sup>, Angela D. Schulze<sup>1</sup>, Jeff H.  
5 T. Strohm<sup>1</sup>, Amy M. Chan<sup>2</sup>, Curtis A. Suttle<sup>2,6,7,8</sup> and Kristina M. Miller<sup>1</sup>

6

7 1 Pacific Biological Station, Fisheries and Oceans Canada, Nanaimo, BC, Canada V9T 6N7

8 2 Department of Earth, Ocean and Atmospheric Sciences, The University of British Columbia,  
9 Vancouver, BC, Canada V6T 1Z4

10 3 Sutherland Bioinformatics, Lantzville, BC, Canada V0R 2H0

11 4 Hakai Institute, PO Box 309, Heriot Bay, BC, Canada, V0P 1H0

12 5 RKS Labs, Parksville, BC, Canada V9P 2A2

13 6 Department of Microbiology and Immunology, The University of British Columbia, Vancouver, BC,  
14 Canada V6T 1Z3

15 7 Department of Botany, The University of British Columbia, Vancouver, BC, Canada V6T 1Z4

16 8 Institute for the Oceans and Fisheries, The University of British Columbia, Vancouver, BC, Canada,  
17 V6T1Z4

18

19 † these authors contributed equally to this work.

20

21 \*Author for correspondence: BJGS

22 Current Address:

23 Sutherland Bioinformatics, Lantzville BC, Canada, V0R 2H0

24 Sutherland.Bioinformatics@protonmail.com

25

26 \*Author for correspondence: JFF

27 Department of Earth, Ocean and Atmospheric Sciences, The University of British Columbia, Vancouver,  
28 BC, Canada, V6T 1Z4

29 Email: [jfinke@eoas.ubc.ca](mailto:jfinke@eoas.ubc.ca)

30

31

32 Data Deposition: Raw metatranscriptome sequence data has been uploaded to SRA under BioProject  
33 PRJNA738385, BioSample SAMN19728638-SAMN19728657.

## 34 **Abstract**

35 Temperate coastal marine waters are often thermally stratified from spring through fall, but can be  
36 dynamic and disrupted by tidal currents and wind-driven upwelling. These mixing events introduce  
37 deeper, cooler water with a higher partial pressure of CO<sub>2</sub> (pCO<sub>2</sub>), and its associated microbial  
38 communities to the surface. Anecdotally, there have been concerns that these changes in water quality as  
39 well as in microbial composition and activity may be involved in mass mortality events of Pacific oysters  
40 (*Crassostrea gigas*) on the East Coast of Vancouver Island, British Columbia. Therefore, improved  
41 understanding of the composition and microbial activity of marine waters associated with seasons and  
42 abiotic variables may be useful in managing these mortality events. To characterize both compositional  
43 and functional changes associated with abiotic factors, here we generate a reference metatranscriptome  
44 from the Strait of Georgia over the representative seasons and analyze metatranscriptomic profiles of the  
45 microorganisms present within intake water containing different pCO<sub>2</sub> levels at a shellfish hatchery in  
46 British Columbia from June through October. Abiotic factors studied include pH, temperature, alkalinity,  
47 aragonite, calcite and pCO<sub>2</sub>. Community composition changes were observed to occur at broad taxonomic  
48 levels, and most notably to vary with temperature and pCO<sub>2</sub>. Functional gene expression profiles  
49 indicated a strong difference between early (June-July) and late summer (August-October) associated  
50 with viral activity. The taxonomic data suggests this could be due to the termination of cyanobacteria and  
51 phytoplankton blooms by viral lysis in the late season. Functional analysis indicated fewer differentially  
52 expressed transcripts associated with abiotic variables (e.g., pCO<sub>2</sub>) than with the temporal effect.  
53 Microbial composition and activity in these waters varies with both short-term effects observed alongside  
54 abiotic variation as well as long-term effects observed across seasonal changes, as captured in the samples  
55 analyzed here. The analysis of both taxonomy and functional gene expression simultaneously in the same  
56 samples (i.e., metatranscriptomics) provided a more comprehensive view for monitoring water bodies  
57 than either would in isolation.

58

59

60 **Keywords:** metatranscriptome assembly; metatranscriptomics; microbial community, ocean acidification;  
61 oyster; pCO<sub>2</sub>; seasonality; transcriptomics

## 62 **Introduction**

63 Metatranscriptomics characterizes expressed genes (i.e., RNA transcripts) that are present in an  
64 environmental sample. These transcripts may be within the cell, or in the extracellular space. While  
65 metagenomics profiles the taxonomy of a sample, metatranscriptomics can profile the biological functions  
66 that are present in the sample and are active or differentially accumulated in particular environments  
67 (Aguilar-Pulido et al. 2016). Metatranscriptomics can also be used to deduce taxonomic information for  
68 dominant taxa in communities (Shi et al. 2011; Neves et al. 2017; Marcelino et al. 2019), in particular  
69 with longer transcriptome contigs, which are expected to produce correct taxonomic assignments (Shakya  
70 et al. 2019). Metatranscriptomics is typically conducted through next-generational sequencing, which has  
71 the benefit of identifying novel genes and functions not known to be used by the identified taxa (Gilbert  
72 et al. 2008). Considering that millions of marine microorganisms and viruses occur within a millilitre of  
73 seawater (Wigington et al. 2016; Finke et al. 2017), these assemblages should be considered as a  
74 collective in their generated functions rather than being restricted to the functions known to be provided  
75 by a single cell or a single taxon (Moran 2015). For detecting an oyster parasite, eRNA was found to  
76 detect a species substantially longer than when using eDNA (Merou et al. 2019). A large scale global  
77 study found indications that the functional gene content in marine microbial samples is largely shaped by  
78 taxonomic composition (Salazar et al. 2019). Due to these reasons, the environmental metatranscriptomic  
79 approach has strong potential for profiling active processes and community composition under changing  
80 conditions in marine molecular ecology (Moran et al. 2013; Cristescu 2019).

81 Globally, the Pacific oyster *Crassostrea gigas* aquaculture industry is dependent both on  
82 hatchery-reared commercial oysters as well as naturalized oysters that can be moved onto farms  
83 (Sutherland et al. 2020). This is a valuable industry that brings jobs to small communities; in British  
84 Columbia, Canada, the Pacific oyster aquaculture industry was recently estimated to produce 14.8 M  
85 CAD in revenue per annum (Sun and Hallin 2018). Pacific oyster hatcheries and farms have both  
86 experienced large-scale mortality events globally in recent years, including in France (Soletchnik et al.  
87 2005), Australia (Li et al. 2007), California (Burge et al. 2007) and British Columbia (Cassis et al. 2011).  
88 Mass mortality events often occur at the spat lifestage (i.e., juveniles attached to substrate; Gomez-Leon  
89 et al. 2005; Garcia et al. 2006). Mortalities of adult oysters nearly ready for harvest are also an issue  
90 (Soletchnik et al. 2005; Solomieu et al. 2015; Green et al. 2019). The mortalities may be caused by a  
91 variety of biotic and abiotic stressors. In many cases, the causes of mass mortality events remain elusive.

92 In some cases oyster mortalities have been linked to various disease causing agents (Renault et al.  
93 2001; Gomez-Leon et al. 2005; Maloy et al. 2007; Solomieu et al. 2015; Green et al. 2019), including  
94 aquatic shellfish pathogens such as *Vibrio* (Gomez-Leon et al. 2005; Paillard et al. 2008), *Roseovarius*  
95 (Maloy et al. 2007), and *Mikrocytos* (Carnegie et al. 2003). Oyster Herpes Virus (OsHV-1)-specific

96 infections have been identified as contributing to massive mortality events in France (Renault et al. 2001;  
97 Davison et al. 2009; Renault et al. 2014; Arzul et al. 2017; Martenot et al. 2017). Harmful algae blooms  
98 have also been associated with oyster mortalities (Landsberg 2010; Cassis et al. 2011). By the nature of  
99 their intertidal habitat and filter feeding lifestyle, oysters are exposed to varying environmental conditions  
100 and microbial assemblages (De Schryver and Vadstein 2014; Lokmer et al. 2016; Cho 2019). It has also  
101 been recognized that the oyster microbiome is in constant exchange with the pool of exogenous  
102 environmental microorganisms (Wegner et al. 2013; Lokmer et al. 2016; Cho A and Finke JF,  
103 *unpublished*), which has the potential to introduce pathogens to the oyster. The cause of oyster mortalities  
104 may be polymicrobial, where stress leads to an initial infection by an agent such as a virus, and then  
105 subsequent bacterial and eukaryote secondary infections can occur. Abiotic correlates to the above  
106 microorganisms and environmental indicators associated with their presence may prove to be a useful tool  
107 to monitor oyster populations on farms and hatcheries.

108 Abiotic perturbations such as temperature, pCO<sub>2</sub>, and salinity, can alter oyster metabolism and  
109 growth, can trigger mortality (Zhao et al. 2012; Dickinson et al. 2012; Wang et al. 2016; Kim et al. 2017)  
110 and can impact microbial assemblages (Ray and To 2012). Coastal water microbial communities form  
111 under widely varying environmental conditions, including ranges of salinity and pH, factors that are  
112 impacted by seasons, tides, or even biological activity (Salisbury et al. 2008; Joint et al. 2011; Lv et al.  
113 2016; Lee et al. 2017). Microbes tolerate pH fluctuations under regular conditions and co-vary with water  
114 bodies in the short-term (Joint et al. 2011), but adjust in the long term. Microbial, bacterial and protist  
115 communities show significant responses to high pCO<sub>2</sub> concentrations (Ray and To 2012; Zhang et al.  
116 2015; Thomson et al. 2016). Average pCO<sub>2</sub> concentrations have increased from 280 ppm before the  
117 industrialization (Friedlingstein et al. 2019) to currently 400 ppm (Blunden and Arndt 2020) and are  
118 deemed to increase to an average of 1000 ppm by the end of this century, with an associated rise of sea  
119 surface temperature by 1°C and drop of pH by 0.29 (Kirtman 2013; Pachauri 2014; Bindoff 2019). The  
120 impact of ocean acidification on overall microbial activity and assemblages is difficult to predict, but the  
121 interactions between environmental variables, microbes, and oyster mortalities are important avenues of  
122 research.

123 Here we compare the microbial composition, active genes, and enriched functional categories of  
124 differentially expressed genes within samples of intake water at a shellfish hatchery over a range of pCO<sub>2</sub>  
125 levels, temperatures, and months. We apply comparative metatranscriptomics by first developing a *de*  
126 *novo* metatranscriptome assembly using the samples in the study. We take a taxonomic approach to view  
127 the community composition of each sample. In parallel, we quantify the relative expression levels of each  
128 transcript among the samples and perform differential gene expression analysis in relation to  
129 environmental metadata. Collectively, this work profiles hatchery intake water across 20 dates over a

130 two-year period. Using environmental metadata, multivariate clustering, differential expression analysis,  
131 and functional enrichment analysis, we characterize these different sampling events in relation to date of  
132 collection and water environmental parameters.

133

## 134 **Materials and Methods**

### 135 *Water collection, RNA extraction and environmental variables*

136 Water samples were collected from the ocean water intake at a Pacific oyster hatchery in Qualicum Bay,  
137 central East Coast Vancouver Island, British Columbia over a two year period, with the majority of  
138 samples collected in 2015 (Supplemental File S1). On each collection day, six litres of water were taken  
139 and filtered through sterile 0.22  $\mu\text{m}$  PVDF filters (Millipore, Burlington, MA). Filters were stored at -  
140 80°C. Temperature was measured by a mercury thermometer, salinity with a refractometer and pH with a  
141 glass probe pH meter (Jenco, San Diego, CA). Alkalinity was measured with a HI901 titrator (Hanna  
142 Instruments, Smithfield, RI), pCO<sub>2</sub> was determined with a LI840A infrared gas analyzer (Li-Cor, Lincoln,  
143 NB), and aragonite and calcite were calculated with the CO2SYS.BAS program  
144 ([https://github.com/jamesorr/CO2SYS-Excel/blob/master/CO2sys\\_mod.bas](https://github.com/jamesorr/CO2SYS-Excel/blob/master/CO2sys_mod.bas)). The filters were then used  
145 for RNA extraction by the Power Water RNA isolation kit (MoBio, Carlsbad, CA) following  
146 manufacturer's instructions, including the alternate lysis step. Output total RNA was depleted for  
147 ribosomal RNA and prepped for RNA-seq using the Scriptseq Complete Gold (Epidemiology) kit  
148 (Illumina, San Diego, CA). A total of ~50 ng of ribosomal depleted RNA was used as an input to  
149 transcriptome libraries. Individual libraries were randomly pooled into groups of four samples using  
150 equimolar quantities and sequenced on a MiSeq v3 600 reagent kit (Illumina, San Diego, CA) to generate  
151 paired-end 250 bp reads. Environmental variables were analyzed in a principal component analysis (PCA)  
152 using the Vegan package (Oksanen et al. 2016) in the R environment (R Core Team, 2022), where  
153 missing values were imputed with unit averages.

154

### 155 *Bioinformatics and metatranscriptome assembly*

156 Raw and quality trimmed sequence data were inspected with FastQC (Andrews 2010) and MultiQC  
157 (Ewels et al. 2016). Quality trimming was conducted to remove low quality reads and adapters with  
158 Cutadapt (Martin 2011) using flags -q 20 to remove < Q20 data from the 3'-end of the read and -m 50 to  
159 remove reads shorter than 50 bp. Results were output as an interleaved fastq. Putative ribosomal RNA  
160 (rRNA) reads were removed using SortMeRNA (Kopylova, Noé, and Touzet 2012) using all suggested  
161 rRNA databases, and therefore enriching for putative messenger RNA (mRNA) *in silico*.

162 Two different approaches were taken to assemble the reference metatranscriptome. First, a  
163 reference metatranscriptome was assembled using the metatranscriptome-optimized assembler IDBA-tran

164 (Peng 2012) with a majority of the samples (16 / 20 samples; 191,303,324 reads), not including all  
165 samples due to computational constraints. Samples used for this approach comprised an equal number of  
166 samples from both ends of the pCO<sub>2</sub> range present in the collections. This assembly was conducted with  
167 default settings and run on 56 threads. Second, a reference metatranscriptome was generated by first  
168 assembling each of the 20 libraries individually using IDBA-tran, and then merging these 20 assemblies  
169 into a single assembly using CD-HIT-EST (Li and Godzik 2006). CD-HIT-EST merged contigs at 95%  
170 similarity, and dedupe.sh of BBTools (Bushnell, Rood, and Singer 2017) was used to de-duplicate with  
171 default parameters (i.e., the ‘merged assembly approach’). These assemblies were compared based on the  
172 total number of contigs, total length, multi-mapping proportions, and mapping percentages to select the  
173 best assembly.

174 Reads for each sample were aligned against the reference metatranscriptome using Bowtie2  
175 (Langmead and Salzberg 2012) in end-to-end mode allowing for multi-mappings. A maximum of 40  
176 alignments were retained for each read. Alignments were then filtered to remove low quality mappings  
177 (i.e., mapq ≥ 2). Retained alignments were quantified using eXpress (Roberts et al. 2013). Effective  
178 counts from eXpress were output into a table in R, and imported into edgeR (Robinson and Oshlack  
179 2010). Filtering was conducted to only retain contigs against which at least five reads mapped in the  
180 sample with the fewest reads (i.e., 3.86 counts per million; CPM), and requiring that the contig was  
181 represented at this CPM level or higher in at least five samples. Retained transcripts were normalized for  
182 library size using the TMM normalization method of edgeR v.3.28.1.

183

#### 184 *Taxonomic community analysis*

185 The expressed transcripts of the metatranscriptome were annotated for taxonomic identity using BLASTn  
186 (Camacho et al. 2009) against the nt database of NCBI, retaining a maximum of 100 alignments and  
187 descriptions per record. Best annotations were selected based on the e-value and a minimum cut-off at E  
188 < 10<sup>-5</sup>. Best match phylogenetic lineages of annotated transcripts were extracted with a custom python  
189 tool (see data accessibility) based on the subject sequence id using the ranked lineage database (NCBI),  
190 and exporting different levels of the taxonomy. The taxonomic overview and characterization used all  
191 expressed genes, at the kingdom, phylum and order level, further analysis was conducted at the genus  
192 level. A canonical correlation analysis (CCA) of genus abundances and environmental variables, as well  
193 as ANOVA tests for significance of regressions were performed with the vegan package in R. To  
194 compare community composition at different lineage levels, pairwise distances were calculated using the  
195 Bray-Curtis dissimilarity measure in vegan, and Mantel tests were performed using the ade4 package  
196 (Dray and Dufour 2007). Linear models of genus abundance versus pCO<sub>2</sub> concentration were conducted  
197 in R, where significant regressions were defined by p < 0.05.

198

### 199 *Differential expression analysis*

200 To view detailed gene expression trends among samples, log<sub>2</sub> CPM values were used for  
201 multidimensional scaling (MDS) plots. The plotMDS function of *limma* v.3.42.2 (Ritchie et al. 2015) was  
202 used to generate MDS plots using both the leading log<sub>2</sub>-fold-change as well as a PCA (gene.selection =  
203 common). Samples were grouped into binary groups for pCO<sub>2</sub> (low/normal versus high) and season for  
204 differential expression analysis. High pCO<sub>2</sub> was considered when the value was greater than 700 ppm,  
205 and low/normal was considered less than 700 ppm. Early summer was considered as June through July,  
206 and late summer was considered for August through October (see Table 1). Expression levels for each  
207 transcript were analyzed in a generalized linear model (i.e., glmFit and glmLRT) in edgeR to analyze the  
208 effect of pCO<sub>2</sub> and the effect of early vs. late summer, and their interaction. Genes with pairwise  $p \leq 0.05$   
209 after Benjamini-Hochberg multiple test correction were considered differentially expressed.

210 To annotate transcripts with functions, expressed transcripts were assigned UniProt descriptions  
211 and identifiers by using BLASTx (Altschul 1997) to align contigs against the Swiss-Prot database  
212 (UniProt 2017) using the pipeline go\_enrichment (Eric Normandeau, see data accessibility), with flags --  
213 max\_target\_seqs 1 in outfmt 6 format, and only retaining hits with  $E < 10^{-5}$ . The UniProt identifier was  
214 used as an input for Gene Ontology (GO) enrichment analysis in DAVID bioinformatics (Huang,  
215 Sherman, and Lempicki 2009), using differentially expressed lists compared against all expressed genes  
216 in the metatranscriptome for those transcripts annotated with UniProt identifiers.

217

## 218 **Results**

### 219 *Sampling and environmental conditions*

220 Intake water at the commercial oyster hatchery on east coast Vancouver Island, BC was sampled on four  
221 separate days in 2014 (June-August) and on 16 days in 2015 (June-November), with the total samples  
222 collected being approximately balanced between the early summer (i.e., June-July,  $n = 11$ ) and late  
223 summer (i.e., August-October,  $n = 9$ ). Environmental variables were measured from the intake water,  
224 including pH, temperature, salinity, alkalinity, aragonite, calcite and pCO<sub>2</sub>, as shown in Table 1 (for  
225 complete data see Supplemental File S1).

226 The focal variable of this study, pCO<sub>2</sub>, ranged from 81-1060 ppm (average = 588 +/- 290 ppm).  
227 Following IPCC assessments (Gattuso 2014) we classify samples into low pCO<sub>2</sub> < 400 ppm ( $n = 6$ ),  
228 medium pCO<sub>2</sub> 400-700 ppm ( $n = 4$ ), and high pCO<sub>2</sub> > 700 ppm ( $n = 10$ ) samples. A two dimensional  
229 PCA of environmental conditions shows variability among samples, separating them by low, medium and  
230 high pCO<sub>2</sub> conditions (Figure 1). Samples S25 and S35, having concentrations of 397 and 386 ppm pCO<sub>2</sub>  
231 cluster close to the medium pCO<sub>2</sub> samples. Samples S22, S26 and S36 have almost identical

232 environmental conditions. The PCA describes 77% of total variation in the first two principal  
233 components, with 52% explained by PC1 and 25% by PC2. The most influential variables in the PCA are  
234 pCO<sub>2</sub> and pH, separating the samples by their pCO<sub>2</sub> classes. The contributions of pCO<sub>2</sub> and pH are  
235 inverse, as are salinity and temperature. Calcium carbonate (CaCO<sub>3</sub>), aragonite and calcite differ in their  
236 variation from the main axes described by pH/pCO<sub>2</sub> and salinity/temperature. Notably, the grouping of  
237 samples by environmental variables does not display clustering by sampling months and the associated  
238 early vs. late summer classification (Figure 1).

239

#### 240 *Sequencing and assembly*

241 The metatranscriptome libraries each yielded on average 14.7 M (s.d. = 2.8 M) paired-end reads.  
242 Depletion of rRNA in library preparation removed most of the rRNA from a majority of the samples,  
243 although for six of the 20 samples, 30-65% of sequenced library remained as rRNA (Figure S1). Residual  
244 rRNA was removed *in silico*, and is primarily comprised of bacterial 23s and eukaryotic 28s rRNA, but  
245 also archaeal rRNA.

246 The reference metatranscriptome was assembled from a total of 191,303,324 mRNA reads  
247 (33,050,961,278 bp) originating from pooling the non-rRNA data from 16 of the samples (n = 8 from  
248 each of low pCO<sub>2</sub> and high pCO<sub>2</sub>). This input produced a final assembly of 8,003,896 contigs (total length  
249 = 2,468,090,451 bp; longest contig: 103,407 bp; N50 = 272 bp; number contigs > 500 bp = 600,691). This  
250 assembly was compared to other assemblies that used fewer libraries, or those that were individually  
251 assembled by sample then subsequently merged (i.e., ‘merged assembly’; see Methods). The collectively-  
252 assembled contigs with the highest number of input samples show fewer multi-mapping reads than did the  
253 merged assembly. The percentage of reads aligning a single time increases substantially until four  
254 libraries were added, then tapers off to not increase notably with eight, 12, or 16 libraries. Although the  
255 addition of more libraries after four libraries did not substantially increase the percentage of reads  
256 mapping, but also did not increase redundancy as evaluated by multi-mapping. The 16 library  
257 collectively-assembled assembly also has a similar number of contigs and total length to the other  
258 assemblies (see Supplemental Results; Figure S2). Therefore, this collectively-assembled assembly was  
259 chosen to be used for all downstream functional analyses (i.e., the ‘final reference metatranscriptome  
260 assembly’).

261 Aligning reads from individual samples against the final reference metatranscriptome assembly  
262 resulted in an average alignment rate per sample of 56% (median = 57%; min. = 37%; max = 68%), with  
263 an average of 40% of the total alignments per sample with both read pairs aligning concordantly a single  
264 time. On average per sample, 12% of reads align concordantly more than once, which may indicate



265 remaining redundancy in the assembly. Applying low expression filters removed the majority of contigs  
266 from the metatranscriptome, retaining 32,866 contigs with CPM  $\geq$  3.86 in at least 5 of 20 samples.

267

### 268 *Taxonomic analysis*

269 In order to infer the community compositions of samples, the taxonomic lineages for expressed transcripts  
270 were analyzed. Taxonomic assignment was successful for 19,315 of the 32,866 expressed transcripts  
271 (59%), but the taxonomic resolution varied among contigs. For example, 89% of the annotated transcripts  
272 resolve to at least the phylum level, 80% to class, 79% to genus and only 30% to the species level. Some  
273 occurring taxa are non-microbial or suspected false taxonomic assignment, and are left out for this  
274 analysis. A total of 708 genera in 104 classes and 58 phyla are annotated, only 10 microbial phyla are  
275 present at an abundance level of greater than 0.5% of the total reads. When combined, these 10 phyla  
276 account for over 95% of all reads, yet several other phyla are represented in the data as well  
277 (Supplemental File S2). These 10 dominant phyla show an abundance of reads assigned to bacteria  
278 (~74%), specifically *Proteobacteria*, *Bacteroidetes*, *Firmicutes*, *Actinobacteria* and *Cyanobacteria*.  
279 Overall, fewer reads are assigned to archaea (~11%), viruses (~9%) and eukaryotes (~1.6%). *Archaea* are  
280 represented by *Thaumarchaeota* and *Euryarchaeota*. Viruses are largely in the class *Caudovirales*  
281 (*Uroviricota*) which includes, for example, bacteriophages and cyanophages, and the *Nucleocytoviricota*  
282 that represent the nucleocytoplasmic large DNA viruses (NCLDV). Eukaryotes are in the phylum  
283 *Bacillariophyta*. Figure 2 shows the variation in community composition of these ten phyla among  
284 samples, *Proteobacteria* and *Bacteroidetes* are clearly dominating in most samples, especially in the early  
285 season. *Cyanobacteria* and *Bacillariophyta* are also mostly present in early season samples. In late season  
286 there is an increase in relative abundance for the *Thaumarchaeota* and *Euryarchaeota*, but especially the  
287 *Uroviricota* and *Nucleocytoviricota* viruses.

288 The overall variation in community composition among samples was evaluated based on Bray-  
289 Curtis similarity in a pairwise distance analysis. When compared at different taxonomic levels, variations  
290 in community compositions are congruent, and this is true for comparisons of genus to class (R=0.97),  
291 class to phylum (R=0.91) and genus to phylum (R=0.90), all showing significant congruence (Mantel test  
292  $p \leq 0.01$ ). A CCA of taxa composition for the 708 genera and environmental variables produces a  
293 significant model (P=0.013), explaining 56% of the total variation in taxon composition through  
294 environmental variables (Figure 3). Of that variation the first dimension (CCA1) describes 39% and the  
295 second dimension (CCA2) describes 27% of the variation. The relationship between sample composition  
296 as indicated by the sample labels and the genera (dots) are shown, taxa are coloured according to the  
297 corresponding four kingdoms. Generally, kingdoms are distributed across the CCA, but eukaryotes show  
298 some grouping with samples S21, S15 and S13. Viruses show grouping with late summer samples S31,

299 S34, S36 and S37. The effect and strength of environmental variables on the sample composition is  
300 indicated by vectors. Temperature and salinity, and pH and pCO<sub>2</sub> describe the predominant dimensions of  
301 variation. A stepwise regression determined that temperature (p=0.001) and pCO<sub>2</sub> (p=0.028) are  
302 significant environmental variables affecting the composition of samples. Additionally, early vs. late  
303 summer is significant (p=0.023) in separating samples by composition. Correlating all 708 genera to  
304 pCO<sub>2</sub>, our main environmental variable of interest, revealed 67 genera that have a significant (p<0.05)  
305 linear correlation of their log<sub>10</sub> transformed abundances to pCO<sub>2</sub> concentrations (Supplemental File S3).  
306 The genera with significant linear correlations are predominantly in the *Proteobacteria*, *Cyanobacteria*,  
307 and *Picornavirales* and *Caudovirales*. Similarly, 93 genera show significant variation between the early  
308 and late season samples, especially *Caudovirales* and *Algavirales* (Supplemental File S4). The top ten  
309 genera for both models are summarized in Table 2.

310

### 311 *Gene expression analysis*

312 After the low expression filter was applied, in total 22,121 (67%) of the expressed contigs (n = 32,866)  
313 were functionally annotated with UniProt identifiers (BLASTx E < 10<sup>-5</sup>). All gene expression analysis  
314 was conducted using both the annotated and unknown transcripts except for functional enrichment  
315 analysis, which depends on the UniProt identifier.

316 Using the filtered expression data, an unsupervised multidimensional scaling plot (MDS plot) was  
317 used to group samples by similarity in gene expression (Figure 4). Based on gene expression signatures  
318 this plot indicates similarity among samples from a common season, where samples from June-July (early  
319 summer) are separated from August-October (late summer/fall), with early season samples (blue) and late  
320 season samples (red) separated on PC1 (Figure 4). One sample is an exception, S19, which groups outside  
321 of its season. Notably, S19 was the only sample from 2014 that was collected in August or later (collected  
322 Aug. 6<sup>th</sup>, 2014; Supplemental File S1). No effect of year nor technical aspects of sample handling are  
323 observed.

324 Based on the observations of the effect of pCO<sub>2</sub> as a key environmental variable on taxonomic  
325 composition and a focal variable of the study, a differential expression analysis was conducted using  
326 pCO<sub>2</sub> separated into either high or medium/low levels, and early summer vs. late summer as binary  
327 explanatory variables, as well as their interaction. There is a larger effect of early vs. late summer than of  
328 pCO<sub>2</sub>, where 2,765 transcripts are found differentially expressed based on early vs. late, and 720 based on  
329 pCO<sub>2</sub>. Of these, 45 are differentially expressed in both contrasts (Supplemental File S5). Of the transcripts  
330 affected by season, 318 are over-expressed in early summer, and 2447 are over-expressed in late  
331 summer/early fall. Of the transcripts affected by pCO<sub>2</sub>, 553 are over-expressed by high pCO<sub>2</sub> and 167 are

332 under-expressed. There are no transcripts showing a significant interaction effect of sampling period and  
333 pCO<sub>2</sub>.

334 Differentially expressed transcripts were used for Gene Ontology (GO) enrichment analysis  
335 (Table 3). Annotated transcripts overexpressed in the early summer (n = 318) are enriched for metabolic  
336 processes and biosynthesis (e.g., cellular macromolecule metabolic process; n = 32 genes; p = 0.01), and  
337 those overexpressed in the late summer are most notably enriched with viral process (biological process;  
338 n = 53; p << 0.0001) and virion (cellular component; n = 30; p << 0.0001). The viral process category is  
339 mainly enriched with transcripts annotated from phage taxa (n = 40 of 53 transcripts; Supplemental File  
340 S6).

341 Genes overexpressed in high pCO<sub>2</sub> include cobalamin biosynthetic process (n = 5, p = 0.003),  
342 organic substance biosynthetic process (n = 81, p = 0.004), and DNA replication (n = 17, p = 0.005).  
343 Genes with lower expression at high pCO<sub>2</sub> include protein maturation (n = 6, p << 0.001) and response to  
344 abiotic stimulus (n = 6, p < 0.001).

345

## 346 **Discussion**

### 347 *Profiled characteristic conditions indicate short-term environmental fluctuations*

348 The collected samples reflect typical intake water of oyster hatcheries from standard aquaculture practices  
349 on East Coast Vancouver Island (Helm 2004), spanning over several months and two years. The variables  
350 were analyzed in a PCA to understand the covariation of environmental variables and how they shape the  
351 sampling conditions. The variation in environmental data describes the characteristic water flow and  
352 carbon chemistry of intertidal oyster habitats and the region of sampling (Strait of Georgia) (Dickinson et  
353 al. 2012; Ianson et al. 2016); salinity and temperature are inversely affected by influxes of cold seawater  
354 with relatively high salinity and warmer fresh water with lower salinities. Water with higher pCO<sub>2</sub>  
355 concentrations are characterized by lower pH values and the combined effect of pH, pCO<sub>2</sub>, and salinity is  
356 reflected in the CaCO<sub>3</sub> concentrations, with calcium being one of the salts in seawater. This relationship  
357 shows in the sample separation by low, medium and high pCO<sub>2</sub> values and the force loadings of  
358 environmental variables. Calcite and aragonite are both derivatives of CaCO<sub>3</sub>, varying based on the pCO<sub>2</sub>  
359 and the pH of water (Doney 2010), and their influence is thus mediated between these two variables. The  
360 clustering of samples observed when considering environmental data highlights the impact of pCO<sub>2</sub> and  
361 salinity and suggests that variations in environmental conditions observed in the scale of the present study  
362 (two years) are driven by short term influxes of fresh or marine waters through tidal cycles and upwelling  
363 of deep waters.

364

365 *Taxonomic composition varies with abiotic factors and early and late summer*

366 The microbial community analysis here is based on sequences with taxonomic assignment. However, we  
367 expect this to be a representative description, with the possible exception of largely uncharacterized taxa  
368 in reference databases. Derived from taxonomic assignments of contigs and their respective expression  
369 levels, community similarity among samples proved to be congruent across different taxonomic levels.  
370 This supports the approach of using taxonomic assignments down to the genus level. Importantly, it also  
371 indicates that shifts in community composition happen at higher taxonomic levels and not just at the  
372 genus or species level. Contigs assigned to non-microbial taxa or terrestrial taxa are expected to be either  
373 the product of dispersed tissue or cells in the water column or alternatively incorrect taxonomic  
374 assignment.

375 Across samples the microbial communities are clearly dominated by *Proteobacteria*,  
376 *Bacteroidetes*, *Firmicutes*, *Actinobacteria* and *Cyanobacteria*. Both eukaryote and archaea  
377 microorganisms are notably less represented, and even matched in abundance by viral sequences. The  
378 described bacterial phyla are commonly found to be dominant in marine (Sunagawa et al. 2015) and  
379 coastal waters (Yung et al. 2016; Yu et al. 2018), and constitute the microbiome of oysters themselves  
380 (Trabal et al. 2012; Lokmer et al. 2015; Lokmer et al. 2016; Dubé et al. 2019; Stevick et al. 2019).  
381 *Proteobacteria* (*Vibrionales*) and *Bacteroidetes* (*Flavobacteria*) in particular represent common marine  
382 microbes and pathogens (Gomez-Leon et al. 2005; Schulze et al. 2006; Paillard et al. 2008; Chen et al.  
383 2017). Observations by Stevick and co-workers (Stevick et al. 2019) found that *Cyanobacteria* were  
384 among the dominant phyla in the oyster rearing water communities and *Synechococcus* is a ubiquitous  
385 cyanobacterial genus in coastal environments (Partensky et al. 1999; Tai and Palenik 2009). Similarly, the  
386 abundant eukaryote *Bacillariophyta* and *Chlorophyta*, both present in the samples taken here, are  
387 common phytoplankton in coastal waters (Worden, Nolan, and Palenik 2004; Armbrust 2009).

388 Matching the microbial community, the dominant *Caudovirales* includes general bacteriophages  
389 and specifically cyanophages (Weinbauer and Rassoulzadegan 2004). The present results are thus  
390 mirroring the general ubiquity of heterotrophic bacteria, but also indicating their lysis. The  
391 *Nucleocytoviricota* include giant viruses commonly infecting protists (Fischer et al. 2010; VanEtten et al.  
392 2010), but also phycodnaviruses infecting eukaryote phytoplankton (e.g. *Chlorophyta*), both being  
393 abundantly present in coastal waters (VanEtten et al. 1982, 2002). Taken together, the observation of a  
394 low presence of cyanobacteria sequences and *Bacillariophyta* sequences alongside high abundance of  
395 plankton viruses and phages in some late season samples, may indicate the lysis of cyanobacteria and  
396 algae blooms later in the season. This observation would match phytoplankton bloom patterns described  
397 for the northern Strait of Georgia where diatoms (*Bacillariophyta*) and prasinophytes (*Chlorophyta*) are  
398 mostly dominant with only periodic cyanobacteria blooms (Del Bel Belluz et al. 2021). Additionally, the

399 general decrease in *Proteobacteria* in the late season samples is observed alongside increased presence of  
400 phage (*Uroviricota*) activity, which also fits with the understanding that bacterial blooms are terminated  
401 by viral lysis. As well, viruses show a correlation to late summer samples in the canonical correspondence  
402 analysis and the T-test.

403 The 67 taxa showing significant linear correlations to pCO<sub>2</sub>, our main environmental variable of  
404 interest, can be considered characteristic for changes in pCO<sub>2</sub> due to water influx. Several of these taxa,  
405 including *Proteobacteria*, *Bacteroidetes*, *Cyanobacteria*, *Firmicutes* and *Deferribacteres* match bacterial  
406 taxa with abundances that are associated with tidal cycles and salinity (Lee et al. 2017; Chen et al. 2019).  
407 There remains a large portion of unexplained variation in the taxonomic data when all taxa are  
408 considered. The CCA shows that only about 50% of the variation among microbial communities could be  
409 explained by the combined environmental variables. The effect of environmental variables on the  
410 taxonomic community data in the CCA matches their interplay in the PCA based on environmental data  
411 (Figure 1). The CCA also confirms that early vs. late summer sampling time has a significant effect on  
412 the community composition, although to a lesser effect than observed in the functional gene expression  
413 results (see below). We could not identify the abiotic variables responsible for the early vs. late summer  
414 effect, which indicates other variables may be involved in community differences are missing (e.g.  
415 nutrients or irradiance levels, among others).

416 In any case, the observed effect and explanatory levels of environmental variables matches  
417 previous studies, where temperature has been shown to be a main variable correlated to community  
418 composition of coastal marine bacterioplankton (El-Swais et al. 2015; Yung et al. 2016; Yu et al. 2018).  
419 Further, Yu and co-workers also established the effect of pH that corresponds to our observations on the  
420 influence of pCO<sub>2</sub> on community composition. Therefore, although some abiotic or biotic variables may  
421 be missing from the study, the results fit with other studies on abiotic factors influencing microbial  
422 communities.

423 Overall, the data show that the microbial communities confronting oysters in hatchery intake  
424 water vary at high taxonomic levels with season. The communities further vary alongside with  
425 environmental variables that are driven by tidal cycles and currents in coastal waters. As demonstrated,  
426 metatranscriptome data can be used to monitor the presence of a wide range of microbes and putative  
427 pathogens in seawater, expanding on the use of specific microbe probing (e.g. Merou et al. 2019).

428

#### 429 *Differential RNA transcript abundance reveals functional variation between early and late summer*

430 Environmental variables are not only expected to alter microbial community composition, but also to  
431 influence the function of cells on the transcriptomic level. Further, a change in community composition  
432 does not always indicate a change in functions within the community if one taxon is replaced by a similar

433 taxon with similar functions. A study comparing taxonomic and functional composition in marine  
434 microbial samples revealed a disconnect between taxonomy and functions (Louca et al. 2016). In the  
435 functional transcriptome analysis of the present study, early and late summer sampling shows a clear  
436 effect on overall transcriptome expression, but environmental variables including pCO<sub>2</sub> do not show clear  
437 groupings of samples in the gene expression data. Consequently, similar to the community composition  
438 results, here functional variation is expected to have been influenced by factors outside of the measured  
439 environmental variables (e.g., nutrients and irradiance levels, among others). The lack of an annual  
440 pattern in gene expression suggests some stability to this temporal trend over the two years analyzed,  
441 however, the grouping of the only August sample (S19) from 2014 not with the late summer but rather  
442 with the early summer unlike the August samples in 2015 may indicate a difference in the exact timing of  
443 the shift in composition observed in each year.

444         The early vs. late summer effect is most notably enriched for transcripts involved in phage viral  
445 activity. Viral dynamics are an underappreciated component of the global ocean carbon cycle. However,  
446 in the North Pacific Ocean it has been observed that viral productivity and abundance is higher in summer  
447 (July) than in winter (Jan-Feb) (Gainer et al. 2017), leading these researchers to conclude that seasonality  
448 is an important consideration to understand viral dynamics (Jiang and Paul 1994; Tsai et al. 2013). A  
449 study within a Korean bay over different seasons found that the number of reads and unique species of  
450 viruses identified differed depending on month; the most viral reads were found in March and December  
451 and the fewest reads in June and September (Hwang 2017). It is recognized that viral composition  
452 changes depend seasonally on a range of factors including temperature, salinity, dissolved oxygen,  
453 primary production and nutrient concentrations (Brum et al. 2015; Fuhrman et al. 2015). Generally, viral  
454 abundance, specifically for dsDNA viruses, has been found to correlate with nutrient concentration, as  
455 well as heterotrophic bacteria abundance (Wigington et al. 2016; Finke et al. 2017). Viruses infecting  
456 bacteria (i.e., bacteriophages) are typically considered among the dominant group of viruses in marine  
457 environments (Breitbart et al. 2002; Steward et al. 2013). In the Korean bay study, 73% of the viral reads  
458 were from bacteriophage, and 26% were from algal viruses, with only 1% involving other viruses (Hwang  
459 et al. 2017).

460         Marine microbial communities are often comprised of a few dominant species and many rare  
461 ones, and results from the Tara Oceans Expedition found approximately 37 k bacterial and archaeal  
462 species, 100 k protist groups and 5.5 k double-stranded bacterial and archaeal virus populations (Moran  
463 2015). The present study found a high degree of variation in gene expression profiles among samples.  
464 Variation could also be expected in the community data as well as the functional expression data. Some  
465 apparent randomness could be expected, but overall the communities are expected to be predictable at  
466 given times, depths and composition of organic matter (Moran 2015). As is suggested from the

467 community composition and transcript activity of the present study, previous metatranscriptome studies  
468 have also found a substantial increase in viral transcripts after a phytoplankton bloom, presumably due to  
469 infected cells in lytic stage (Gilbert et al. 2008).

470 The effect of pCO<sub>2</sub> was also investigated in the differential expression analysis, but this had a  
471 lesser effect than that the temporal effect observed. Interestingly, in the present study, overexpression of  
472 protein chaperones was observed at low pCO<sub>2</sub>, which is the opposite to previous observations in high  
473 pCO<sub>2</sub> mesocosms, where metatranscriptomic responses of overexpressed chaperonin transcripts was  
474 observed (Gilbert et al. 2008).

475 Overall, taxonomic and transcriptomic profiling complemented each other and when combined  
476 provided a comprehensive view of the changes observed in this study. This matches the observation by  
477 Salazar et al. (2019) that the correlation between taxonomic composition and functional composition is  
478 variable. The community composition analysis provided more information on taxa associated with abiotic  
479 factors, and the functional analysis highlighted the large effect of viral activity that differed over time  
480 during the summer months.

481

## 482 **Conclusions**

483 Increased knowledge on the potential for biotic influences into mortality events in oyster aquaculture,  
484 associated with abiotic factors, is an important objective to facilitate monitoring or mitigation of losses.  
485 Changing environmental conditions may occur over short time scales through upwelling or changing of  
486 currents, or may have large, structured changes that occur temporally. In the present study, microbial  
487 communities were derived from metatranscriptome data, which avoided primer bias that occurs in  
488 amplicon-based approaches, and captures data from all kingdoms of life. The observed variability among  
489 microbial communities was found to be associated with both temperature and pCO<sub>2</sub>, as well as other  
490 changes that occurred between early and late summer. These temporal and abiotic factors appeared to be  
491 disconnected and were two different trends occurring in the marine environment. The functional gene  
492 expression analysis pointed to a strong difference in viral activity moving into the late season, and a much  
493 lesser effect of abiotic factors such as pCO<sub>2</sub>, temperature and salinity. Together, these analyses provide  
494 community composition and functional gene differences associated with abiotic factors and time, and  
495 likely captured viral termination of bacterial, cyanobacterial and algal blooms later in the season.  
496 Metatranscriptomics allowed the characterization of both community changes as well as gene expression  
497 activity changes within these communities simultaneously, providing a comprehensive view of the  
498 changes occurring in these water bodies.

499

## 500 **Acknowledgements**

501 This project would not have been possible without the involvement, contributions, and sample provision  
502 from the industry partner, Island Scallops (ISL; CEO Robert Saunders). J. Finke and B. Sutherland were  
503 supported during this work by a grant from the Gordon and Betty Moore Foundation (GBMF, Grant  
504 number 5600) awarded to C. Suttle and K. Miller. This project was supported by an Aquaculture  
505 Collaborative Research and Development Program (ACRDP) grant from Fisheries and Oceans, Canada,  
506 awarded to K. Miller (Grant number P-14-02-001).

507

## 508 **Data Accessibility**

509 Supplemental files including the reference metatranscriptome (fasta), quantified transcript expression  
510 levels (.csv), and annotation for the functional and taxonomic analyses (.txt) are available on FigShare:  
511 <https://doi.org/10.6084/m9.figshare.18128966.v1>

512 Pipeline for analyzing metatranscriptome data: [https://github.com/bensutherland/eRNA\\_taxo](https://github.com/bensutherland/eRNA_taxo)

513 Pipeline used for annotating transcripts: [https://github.com/enormandeu/go\\_enrichment](https://github.com/enormandeu/go_enrichment)

514 Script to extract taxonomic lineages:

515 [https://github.com/janfelix/bioinformatic\\_tools/blob/master/taxid2lineage.py](https://github.com/janfelix/bioinformatic_tools/blob/master/taxid2lineage.py)

516



## 517 References

- 518 Aguiar-Pulido, Vanessa, Wenrui Huang, Victoria Suarez-ulloa, Trevor Cickovski, Kalai Mathee, and Giri  
519 Narasimhan. 2016. “Approaches for Microbiome Analysis” *Evolutionary Bioinformatics* 12: 5–16.  
520 <https://doi.org/10.4137/EBO.S36436>.TYPE.
- 521 Andrews, S. 2010. “FastQC: A quality control tool for high throughput sequence data” Available online  
522 at: <http://www.bioinformatics.babraham.ac.uk/projects/fastqc>
- 523 Armbrust, E. Virginia. 2009. “The Life of Diatoms in the World’s Oceans.” *Nature* 459 (7244): 185–92.  
524 <https://doi.org/10.1038/nature08057>.
- 525 Arzul, Isabelle, Serge Corbeil, Benjamin Morga, and Tristan Renault. 2017. “Viruses Infecting Marine  
526 Molluscs.” *Journal of Invertebrate Pathology* 147: 118–35.  
527 <https://doi.org/10.1016/j.jip.2017.01.009>.
- 528 Bindoff, Nathaniel L. 2019. “Changing Ocean, Marine Ecosystems, and Dependent Communities. In:  
529 IPCC Special Report on the Ocean and Cryosphere in a Changing Climate.”
- 530 Blunden, J., and D. S. Arndt. 2020. “State of the Climate in 2019.” *Bulletin of the American*  
531 *Meteorological Society*. Vol. 101. <https://doi.org/10.1175/2020BAMSStateoftheClimate.1>.
- 532 Breitbart, Mya, Peter Salamon, Bjarne Andresen, Joseph M. Mahaffy, Anca M. Segall, David Mead,  
533 Farooq Azam, and Forest Rohwer. 2002. “Genomic Analysis of Uncultured Marine Viral  
534 Communities.” *Proceedings of the National Academy of Sciences of the United States of America* 99  
535 (22): 14250–55. <https://doi.org/10.1073/pnas.202488399>.
- 536 Brum, Jennifer R., J. Cesar Ignacio-Espinoza, Simon Roux, Guilhem Doulcier, Silvia G. Acinas, Adriana  
537 Alberti, Samuel Chaffron, et al. 2015. “Patterns and Ecological Drivers of Ocean Viral  
538 Communities.” *Science* 348 (6237). <https://doi.org/10.1126/science.1261498>.
- 539 Burge, Colleen A, Linda R Judah, Loveday L Conquest, Frederick J Griffin, Daniel P Cheney, Andrew  
540 Suhrbier, Brent Vadopalas, Paul G Olin, Tristan Renault, and Carolyn S Friedman. 2007. “Summer  
541 Seed Mortality of the Pacific Oyster, *Crassostrea Gigas* Thunberg Grown in Tomales Bay,  
542 California, USA: The Influence of Oyster Stock, Planting Time, Pathogens, and Environmental  
543 Stressors.” *Journal of Shellfish Research* 26 (1): 163–72. [http://dx.doi.org/10.2983/0730-](http://dx.doi.org/10.2983/0730-8000(2007)26[163:SSMOTP]2.0.CO;2)  
544 [8000\(2007\)26\[163:SSMOTP\]2.0.CO;2](http://dx.doi.org/10.2983/0730-8000(2007)26[163:SSMOTP]2.0.CO;2)
- 545 Bushnell, Brian, “BBMap – sourceforge.net/projects/bbmap/” as per:  
546 <https://jgi.doe.gov/data-and-tools/bbtools/>
- 547 Camacho, Christiam, George Coulouris, Vahram Avagyan, Ning Ma, Jason Papadopoulos, Kevin Bealer,  
548 and Thomas L. Madden. 2009. “BLAST+: Architecture and Applications.” *BMC Bioinformatics* 10:  
549 1–9. <https://doi.org/10.1186/1471-2105-10-421>.
- 550 Carnegie, Ryan B, Gary R Meyer, Janice Blackburn, Nathalie Cochennec-laureau, Franck C J Berthe,  
551 and Susan M Bower. 2003. “Molecular Detection of the Oyster Parasite *Mikrocytos Mackini* , and a  
552 Preliminary Phylogenetic Analysis.” *Diseases of Aquatic Organisms* 54: 219–27.  
553 <https://doi.org/10.3354/dao054219>
- 554 Cassis, David, Christopher M. Pearce, and Maria T. Maldonado. 2011. “Effects of the Environment and  
555 Culture Depth on Growth and Mortality in Juvenile Pacific Oysters in the Strait of Georgia, British  
556 Columbia.” *Aquaculture Environment Interactions* 1 (3): 259–74. <https://doi.org/10.3354/aei00025>.
- 557 Chen, Shicheng, Jochen Blom, Thomas P. Loch, Mohamed Faisal, and Edward D. Walker. 2017. “The  
558 Emerging Fish Pathogen *Flavobacterium Spartansii* Isolated from Chinook Salmon: Comparative  
559 Genome Analysis and Molecular Manipulation.” *Frontiers in Microbiology* 8 (NOV).  
560 <https://doi.org/10.3389/fmicb.2017.02339>.
- 561 Chen, Xiaowei, Wei Wei, Jianning Wang, Hongbo Li, Jia Sun, Ruijie Ma, Nianzhi Jiao, and Rui Zhang.  
562 2019. “Tide Driven Microbial Dynamics through Virus-Host Interactions in the Estuarine  
563 Ecosystem.” *Water Research* 160: 118–29. <https://doi.org/10.1016/j.watres.2019.05.051>.
- 564 Cho, Anna. 2019. “Characterizing the Microbiome of Farmed Pacific Oysters from British Columbia and  
565 Alaska.” <https://doi.org/10.14288/1.0376801>.
- 566 Cristescu, Melania E. 2019. “Can Environmental RNA Revolutionize Biodiversity Science?” *Trends in*

- 567 *Ecology and Evolution* 34 (8): 694–97. <https://doi.org/10.1016/j.tree.2019.05.003>.
- 568 Davison, Andrew J, Richard Eberle, Bernhard Ehlers, Gary S Hayward, Duncan J Mcgeoch, Anthony C  
569 Minson, Philip E Pellett, et al. 2009. “The Order Herpesvirales.” *Virology Division News* 154: 171–  
570 77. <https://doi.org/10.1007/s00705-008-0278-4>.
- 571 De Schryver, Peter, and Olav Vadstein. 2014. “Ecological Theory as a Foundation to Control Pathogenic  
572 Invasion in Aquaculture.” *ISME Journal* 8 (12): 2360–68. <https://doi.org/10.1038/ismej.2014.84>.
- 573 Del Bel Belluz, Justin Del, M. Angelica Peña, Jennifer M. Jackson, and Nina Nemcek. 2021.  
574 “Phytoplankton Composition and Environmental Drivers in the Northern Strait of Georgia (Salish  
575 Sea), British Columbia, Canada.” *Estuaries and Coasts*. [https://doi.org/10.1007/s12237-020-00858-](https://doi.org/10.1007/s12237-020-00858-2)  
576 2.
- 577 Dickinson, G. H., A. V. Ivanina, O. B. Matoo, H. O. Portner, G. Lannig, C. Bock, E. Beniash, and I. M.  
578 Sokolova. 2012. “Interactive Effects of Salinity and Elevated CO<sub>2</sub> Levels on Juvenile Eastern  
579 Oysters, *Crassostrea Virginica*.” *Journal of Experimental Biology* 215 (1): 29–43.  
580 <https://doi.org/10.1242/jeb.061481>.
- 581 Doney, Scott C. 2010. “The Growing Human Footprint on Coastal and Open-Ocean Biogeochemistry.”  
582 *Science* 328 (5985): 1512–16. <https://doi.org/10.1126/science.1185198>.
- 583 Dray, S, and A B Dufour. 2007. “The Ade4 Package: Implementing the Duality Diagram for Ecologists.”  
584 *Journal of Statistical Software* 22. <http://dx.doi.org/10.18637/jss.v022.i04>
- 585 Dubé, Caroline Eve, Chin Long Ky, and Serge Planes. 2019. “Microbiome of the Black-Lipped Pearl  
586 Oyster *Pinctada Margaritifera*, a Multi-Tissue Description with Functional Profiling.” *Frontiers in*  
587 *Microbiology* 10 (JULY): 1–17. <https://doi.org/10.3389/fmicb.2019.01548>.
- 588 El-Swais, Heba, Katherine A Dunn, Joseph P Bielawski, William K W Li, and David A Walsh. 2015.  
589 “Seasonal Assemblages and Short-Lived Blooms in Coastal North-West Atlantic Ocean  
590 Bacterioplankton.” *Environmental Microbiology* 17 (10): 3642–61. [https://doi.org/10.1111/1462-](https://doi.org/10.1111/1462-2920.12629)  
591 2920.12629.
- 592 Ewels, Philip, Måns Magnusson, Sverker Lundin, and Max Källér. 2016. “MultiQC: Summarize Analysis  
593 Results for Multiple Tools and Samples in a Single Report.” *Bioinformatics* 32 (19): 3047–48.  
594 <https://doi.org/10.1093/bioinformatics/btw354>.
- 595 Finke, Jan F., Brian P.V. Hunt, Christian Winter, Eddy C. Carmack, and Curtis A. Suttle. 2017.  
596 “Nutrients and Other Environmental Factors Influence Virus Abundances across Oxidic and Hypoxic  
597 Marine Environments.” *Viruses* 9 (6): 1–15. <https://doi.org/10.3390/v9060152>.
- 598 Fischer, Matthias G, Michael J Allen, William H Wilson, and Curtis A Suttle. 2010. “Giant Virus with a  
599 Remarkable Complement of Genes Infects Marine Zooplankton.” *PNAS*, 1–6.  
600 [https://doi.org/10.1073/pnas.1007615107/-/DCSupplemental.www.pnas.org/cgi/doi/10.1073/](https://doi.org/10.1073/pnas.1007615107/-/DCSupplemental.www.pnas.org/cgi/doi/10.1073/pnas.1007615107)  
601 [pnas.1007615107](https://doi.org/10.1073/pnas.1007615107).
- 602 Fitzer, Susan C., Vernon R. Phoenix, Maggie Cusack, and Nicholas A. Kamenos. 2014. “Ocean  
603 Acidification Impacts Mussel Control on Biomineralisation.” *Scientific Reports* 4.  
604 <https://doi.org/10.1038/srep06218>.
- 605 Friedlingstein, Pierre, Matthew W Jones, Michael O Sullivan, Robbie M Andrew, Judith Hauck, Glen P  
606 Peters, Wouter Peters, Julia Pongratz, Stephen Sitch, and Corinne Le Quéré. 2019. “Global Carbon  
607 Budget 2019,” *Earth Syst. Sci. Data* 1783–1838.
- 608 Fuhrman, Jed A, Jacob A Cram, and David M Needham. 2015. “Marine Microbial Community Dynamics  
609 and Their Ecological Interpretation.” *Nature Publishing Group* 13 (3): 133–46.  
610 <https://doi.org/10.1038/nrmicro3417>.
- 611 Gainer, P. Jackson, Helena L. Pound, Alyse A. Larkin, Gary R. LeClerc, Jennifer M. DeBruyn, Erik R.  
612 Zinser, Zackary I. Johnson, and Steven W. Wilhelm. 2017. “Contrasting Seasonal Drivers of Virus  
613 Abundance and Production in the North Pacific Ocean.” *PLoS ONE* 12 (9): 1–18.  
614 <https://doi.org/10.1371/journal.pone.0184371>.
- 615 Garcia, Céline, Maeva Robert, Isabelle Arzul, Bruno Chollet, Jean-pierre Joly, Laurence Miossec, Thierry  
616 Comtet, and Franck Berthe. 2006. “Viral Gametocytic Hypertrophy of *Crassostrea Gigas* in France :  
617 From Occasional Records to Disease Emergence?” *Disease of Aquatic Organisms* 70 (Farley 1976):

- 618 193–99. <https://doi.org/10.3354/dao070193>
- 619 Gilbert, Jack A., Dawn Field, Ying Huang, Rob Edwards, Weizhong Li, Paul Gilna, and Ian Joint. 2008.  
620 “Detection of Large Numbers of Novel Sequences in the Metatranscriptomes of Complex Marine  
621 Microbial Communities.” *PLoS ONE* 3 (8). <https://doi.org/10.1371/journal.pone.0003042>.
- 622 Gomez-Leon, J, L Villamil, M L Lemos, B Novoa, and A Figueras. 2005. “Isolation of *Vibrio*  
623 *Alginolyticus* and *Vibrio Splendidus* from Aquacultured Carpet Shell Clam ( *Ruditapes*  
624 *Decussatus* ) Larvae Associated with Mass Mortalities.” *Applied and Environmental Microbiology*  
625 71 (1): 98–104. <https://doi.org/10.1128/AEM.71.1.98>.
- 626 Green, Timothy J., Nachshon Siboni, William L. King, Maurizio Labbate, Justin R. Seymour, and David  
627 Raftos. 2019. “Simulated Heat Wave Alters Abundance and Structure of *Vibrio* Populations  
628 Associated with the Pacific Oyster Resulting in Mass Mortality Events.” *Microbial Ecology* 77 :  
629 736–747. <https://doi.org/10.1007/s00248-018-1242-9>.
- 630 Helm, Michael M. 2004. “Hatchery Culture of Bivalves.” Rome.
- 631 Huang, Da Wei, Brad T. Sherman, and Richard A. Lempicki. 2009. “Systematic and Integrative Analysis  
632 of Large Gene Lists Using DAVID Bioinformatics Resources.” *Nature Protocols* 4 (1): 44–57.  
633 <https://doi.org/10.1038/nprot.2008.211>.
- 634 Hwang, Jinik, So Yun Park, Mirye Park, Sukchan Lee, and Taek Kyun Lee. 2017. “Seasonal Dynamics  
635 and Metagenomic Characterization of Marine Viruses in Goseong Bay, Korea.” *PLoS ONE* 12 (1):  
636 1–15. <https://doi.org/10.1371/journal.pone.0169841>.
- 637 Ianson, Debby, Susan E. Allen, Benjamin L. Moore-Maley, Sophia C. Johannessen, and Robie W.  
638 Macdonald. 2016. “Vulnerability of a Semienclosed Estuarine Sea to Ocean Acidification in  
639 Contrast with Hypoxia.” *Geophysical Research Letters* 43 (11): 5793–5801.  
640 <https://doi.org/10.1002/2016GL068996>.
- 641 Jiang, S C, and J H Paul. 1994. “Seasonal and Diel Abundance of Viruses and Occurrence of  
642 Lysogeny/Bacteriocinogeny in the Marine Environment.” *Marine Ecology Progress Series* 104:  
643 163–72. <http://dx.doi.org/10.3354/meps104163>
- 644 Kim, Bo Mi, Kyobum Kim, Ik Young Choi, and Jae Sung Rhee. 2017. “Transcriptome Response of the  
645 Pacific Oyster, *Crassostrea Gigas* Susceptible to Thermal Stress: A Comparison with the Response  
646 of Tolerant Oyster.” *Molecular and Cellular Toxicology* 13 (1): 105–13.  
647 <https://doi.org/10.1007/s13273-017-0011-z>.
- 648 Kirtman, Ben. 2013. “Near-Term Climate Change: Projections and Predictability. In: Climate Change  
649 2013: The Physical Science Basis. Contribution of Working Group I to the Fifth Assessment Report  
650 of the Intergovernmental Panel on Climate Change.”
- 651 Kopylova, Evguenia, Laurent Noé, and Hélène Touzet. 2012. “SortMeRNA: Fast and Accurate Filtering  
652 of Ribosomal RNAs in Metatranscriptomic Data.” *Bioinformatics* 28 (24): 3211–17.  
653 <https://doi.org/10.1093/bioinformatics/bts611>.
- 654 Landsberg, Jan H. 2010. “The Effects of Harmful Algal Blooms on Aquatic Organisms” *Reviews in*  
655 *Fisheries Sciences* 1262: 113–390. <https://doi.org/10.1080/20026491051695>.
- 656 Langmead, Ben, and Steven L. Salzberg. 2012. “Fast Gapped-Read Alignment with Bowtie 2.” *Nature*  
657 *Methods* 9 (4): 357–59. <https://doi.org/10.1038/nmeth.1923>.
- 658 Lee, Eunhee, Doyun Shin, Sung Pil Hyun, Kyung Seok Ko, Hee Sun Moon, Dong Chan Koh, Kyoochul  
659 Ha, and Byung Yong Kim. 2017. “Periodic Change in Coastal Microbial Community Structure  
660 Associated with Submarine Groundwater Discharge and Tidal Fluctuation.” *Limnology and*  
661 *Oceanography* 62 (2): 437–51. <https://doi.org/10.1002/lno.10433>.
- 662 Li, Weizhong, and Adam Godzik. 2006. “Cd-Hit: A Fast Program for Clustering and Comparing Large  
663 Sets of Protein or Nucleotide Sequences.” *Bioinformatics* 22 (13): 1658–59.  
664 <https://doi.org/10.1093/bioinformatics/btl158>.
- 665 Li, Yan, Jian G Qin, Catherine A Abbott, Xiaoxu Li, and Kirsten Benkendorff. 2007. “Synergistic  
666 Impacts of Heat Shock and Spawning on the Physiology and Immune Health of *Crassostrea Gigas*:  
667 An Explanation for Summer Mortality in Pacific Oysters.” *American Journal of Physiology*, no.  
668 293: 2353–62. <https://doi.org/10.1152/ajpregu.00463.2007>.

- 669 Lokmer, Ana, M Anouk Goedknecht, David W Thielges, Dario Fiorentino, Sven Kuenzel, John F Baines,  
670 and K Mathias Wegner. 2016. "Spatial and Temporal Dynamics of Pacific Oyster Hemolymph  
671 Microbiota across Multiple Scales" *Front. Microbiol.* 7 (August): 1–18.  
672 <https://doi.org/10.3389/fmicb.2016.01367>.
- 673 Lokmer, Ana, and Karl Mathias Wegner. 2015. "Hemolymph Microbiome of Pacific Oysters in Response  
674 to Temperature, Temperature Stress and Infection." *ISME Journal* 9 (3): 670–82.  
675 <https://doi.org/10.1038/ismej.2014.160>.
- 676 Louca, S, L Wegener Parfrey, and M Doebeli. 2016. "Decoupling Function and Taxonomy in the Global  
677 Ocean Microbiome." *Science (New York, N.Y.)* 353 (6305): 1272–77.  
678 <https://doi.org/10.1126/science.aaf4507>
- 679 Lv, Xiaofei, Bin Ma, Junbao Yu, Scott X. Chang, Jianming Xu, Yunzhao Li, Guangmei Wang,  
680 Guangxuan Han, Guan Bo, and Xiaojing Chu. 2016. "Bacterial Community Structure and Function  
681 Shift along a Successional Series of Tidal Flats in the Yellow River Delta." *Scientific Reports* 6  
682 (November): 1–10. <https://doi.org/10.1038/srep36550>.
- 683 Maloy, Aaron P, Susan E Ford, Richard C Karney, and Katherine J Boettcher. 2007. "Roseovarius  
684 Crassostreae, the Etiological Agent of Juvenile Oyster Disease (Now to Be Known as Roseovarius  
685 Oyster Disease) in Crassostrea Virginica." *Aquaculture* 269: 71–83.  
686 <https://doi.org/10.1016/j.aquaculture.2007.04.008>.
- 687 Marcelino, Vanesa R., Laszlo Irinyi, John Sebastian Eden, Wieland Meyer, Edward C. Holmes, and Tania  
688 C. Sorrell. 2019. "Metatranscriptomics as a Tool to Identify Fungal Species and Subspecies in  
689 Mixed Communities." *IMA Fungus* 10. <https://doi.org/10.1186/s43008-019-0012-8>.
- 690 Martenot, Claire, Ophélie Gervais, Bruno Chollet, Maryline Houssin, and Tristan Renault. 2017.  
691 "Haemocytes Collected from Experimentally Infected Pacific Oysters, Crassostrea Gigas: Detection  
692 of Ostreid Herpesvirus 1 DNA, RNA, and Proteins in Relation with Inhibition of Apoptosis." *PLoS*  
693 *ONE* 12 (5): 1–19. <https://doi.org/10.1371/journal.pone.0177448>.
- 694 Martin, M. 2011. "Cutadapt Removes Adapter Sequences from High-Throughput Sequencing Reads."  
695 *EMBnet* 7 (10): 2803–9. <https://doi.org/10.14806/ej.17.1.200>
- 696 Merou, Nicolas, Cyrielle Lecadet, Stephane Pouvreau and Isabelle Arzul. 2019. "An eDNA/eRNA-based  
697 approach to investigate the life cycle of non-cultivable shellfish micro-parasites: the case of  
698 Bonamia ostreae, a parasite of the European flat oyster Crassostrea edulis." *Microbial*  
699 *Biotechnology* 0 (0): 1-12. doi:10.1111/1751-7915.13617.
- 700 Moran, Mary Ann. 2015. "The Global Ocean Microbiome." *Science* 350 (6266).  
701 <https://doi.org/10.1126/science.aac8455>.
- 702 Moran, Mary Ann, Brandon Satinsky, Scott M. Gifford, Haiwei Luo, Adam Rivers, Leong Keat Chan,  
703 Jun Meng, et al. 2013. "Sizing up Metatranscriptomics." *ISME Journal* 7 (2): 237–43.  
704 <https://doi.org/10.1038/ismej.2012.94>.
- 705 Neves, Andre L.A., Fuyong Li, Bibaswan Ghoshal, Tim McAllister, and Le L. Guan. 2017. "Enhancing  
706 the Resolution of Rumen Microbial Classification from Metatranscriptomic Data Using Kraken and  
707 Mothur." *Frontiers in Microbiology* 8 (DEC): 1–13. <https://doi.org/10.3389/fmicb.2017.02445>.
- 708 Oksanen, Jari, Guillaume F Blanchet, Roeland Kindt, Pierre Legendre, Peter R Minchin, R B O'Hara,  
709 Gavin L Simpson, Peter Solymos, M Henry H Stevens, and Helene Wagner. 2016. "Vegan:  
710 Community Ecology Package. R Package Version 2.3-3." 2016.  
711 <http://cran.r-project.org/package=vegan>.
- 712 Pachauri, Rajendra K. 2014. "Climate Change 2014: Synthesis Report. Contribution of Working Groups  
713 I, II and III to the Fifth Assessment Report of the Intergovernmental Panel on Climate Change."  
714 *Contribution of Working Groups I, II and III to the Fifth Assessment Report of the*  
715 *Intergovernmental Panel on Climate Change*.
- 716 Paillard, Christine, Kjetil Korsnes, Patrick Le Chevalier, Christine Le Boulay, Lisbeth Harkestad, Anne  
717 Grete Eriksen, Endre Willassen, et al. 2008. "Vibrio Tapetis-like Strain Isolated from Introduced  
718 Manila Clams Ruditapes Philippinarum Showing Symptoms of Brown Ring Disease in Norway."  
719 *Disease of Aquatic Organisms* 81: 153–61. <https://doi.org/10.3354/dao01950>.

- 720 Partensky, F, J Blanchot, and D Vaultot. 1999. “Differential Distribution and Ecology of Prochlorococcus  
721 and Synechococcus in Oceanic Waters : A Review.” *Bulletin de l’Institute Oceanographic Monaco*.  
722 R Core Team. 2022. “R: A Language and Environment for Statistical Computing. R Foundation for  
723 Statistical Computing, Vienna, Austria.” 2015. <http://www.r-project.org>.  
724 Ray, Jessica L, Birte Topper, Shu An, Anna Silyakova, Joachim Spindelbock, Runar Thyrhaug, Michael  
725 S DuBow, T Frede Thingstad, Ruth-Anne Sandaa. 2012. “Effect of Increased pCO<sub>2</sub> on Bacterial  
726 Assemblage Shifts in Response to Glucose Addition in Fram Strait Seawater Mesocosms.” *FEMS  
727 Microbiology Ecology* <https://doi.org/10.1111/j.1574-6941.2012.01443.x>.  
728 Renault, Tristan, Anne Lise Bouquet, Julien Thomas Maurice, Coralie Lupo, and Philippe Blachier. 2014.  
729 “Ostreid Herpesvirus 1 Infection among Pacific Oyster (*Crassostrea Gigas*) Spat: Relevance of  
730 Water Temperature to Virus Replication and Circulation Prior to the Onset of Mortality.” *Applied  
731 and Environmental Microbiology* 80 (17): 5419–26. <https://doi.org/10.1128/AEM.00484-14>.  
732 Renault, Tristan, Cécile Lipart, and Isabelle Arzul. 2001. “A Herpes-like Virus Infects a Non-Ostreid  
733 Bivalve Species : Virus Replication in Ruditapes Philippinarum Larvae.” *Disease of Aquatic  
734 Organisms* 45 (June 1997): 1–7. <https://doi.org/10.3354/dao045001>  
735 Ritchie, Matthew E., Belinda Phipson, Di Wu, Yifang Hu, Charity W. Law, Wei Shi, and Gordon K.  
736 Smyth. 2015. “Limma Powers Differential Expression Analyses for RNA-Sequencing and  
737 Microarray Studies.” *Nucleic Acids Research* 43 (7): e47. <https://doi.org/10.1093/nar/gkv007>.  
738 Roberts, Adam, Harvey Feng, and Lior Pachter. 2013. “Fragment Assignment in the Cloud with EXpress-  
739 D.” *BMC Bioinformatics* 14 (1): 1–9. <https://doi.org/10.1186/1471-2105-14-358>.  
740 Robinson, Mark D., and Alicia Oshlack. 2010. “A Scaling Normalization Method for Differential  
741 Expression Analysis of RNA-Seq Data.” *Genome Biology* 11 (3). [https://doi.org/10.1186/gb-2010-  
742 11-3-r25](https://doi.org/10.1186/gb-2010-11-3-r25)  
743 Salisbury, Joseph, Mark Green, Chris Hunt, and Janet Campbell. 2008. “Coastal Acidification by Rivers:  
744 A Threat to Shellfish?” *EOS* 89 (50): 513. <https://doi.org/10.1029/2008EO500001>  
745 Salazar, Guillem, Lucas Paoli, Adriana Alberti, Jaime Huerta-Cepas, Hans-Joachim Ruscheweyh,  
746 Miguelangel Cuenca, Christopher M. Field, Luis Pedro Coelho, Corinne Cruaud, Stefan Engelen,  
747 Ann C. Gregory, Karine Labadie, Claudie Marec, Eric Pelletier, Marta Royo-Llonch, Simon Roux,  
748 Pablo Sánchez, Hideya Uehara, Ahmed A. Zayed, Georg Zeller, Margaux Carmichael, Céline  
749 Dimier, Joannie Ferland, Stefanie Kandels, Marc Picheral, Sergey Pisarev, Julie Poulain, Silvia G.  
750 Acinas, Marcel Babin, Peer Bork, Emmanuel Boss, Chris Bowler, Guy Cochrane, Colomban de  
751 Vargas, Michael Follows, Gabriel Gorsky, Nigel Grimsley, Lionel Guidi, Pascal Hingamp, Daniele  
752 Iudicone, Olivier Jaillon, Stefanie Kandels-Lewis, Lee Karp-Boss, Eric Karsenti, Fabrice Not,  
753 Hiroyuki Ogata, Stephane Pesant, Nicole Poulton, Jeroen Raes, Christian Sardet, Sabrina Speich,  
754 Lars Stemann, Matthew B. Sullivan, Shinichi Sunagawa, Patrick Wincker, Silvia G. Acinas,  
755 Marcel Babin, Peer Bork, Chris Bowler, Colomban de Vargas, Lionel Guidi, Pascal Hingamp,  
756 Daniele Iudicone, Lee Karp-Boss, Eric Karsenti, Hiroyuki Ogata, Stephane Pesant, Sabrina Speich,  
757 Matthew B. Sullivan, Patrick Wincker, Shinichi Sunagawa. 2005. “Gene Expression Changes and  
758 Community Turnover Differentially Shape the Global Ocean Metatranscriptome.” *Cell* 179 (5):  
759 1068-1083. <https://doi.org/10.1016/j.cell.2019.10.014>.  
760 Schulze, Angela D., Abayomi O. Alabi, Adele R. Tattersall-Sheldrake, and Kristina M. Miller. 2006.  
761 “Bacterial Diversity in a Marine Hatchery: Balance between Pathogenic and Potentially Probiotic  
762 Bacterial Strains.” *Aquaculture* 256 (1–4): 50–73. <https://doi.org/10.1016/j.aquaculture.2006.02.008>.  
763 Shakya, Migun, Chien Chi Lo, and Patrick S.G. Chain. 2019. “Advances and Challenges in  
764 Metatranscriptomic Analysis.” *Frontiers in Genetics* 10 (SEP): 1–10.  
765 <https://doi.org/10.3389/fgene.2019.00904>.  
766 Shi, Yanmei, Gene W. Tyson, John M. Eppley, and Edward F. DeLong. 2011. “Integrated  
767 Metatranscriptomic and Metagenomic Analyses of Stratified Microbial Assemblages in the Open  
768 Ocean.” *ISME Journal* 5 (6): 999–1013. <https://doi.org/10.1038/ismej.2010.189>.  
769 Soletchnik, Patrick, Christophe Lambert, and Katherine Costil. 2005. “Summer Mortality of *Crassostrea  
770 Gigas* (Thunberg) in Relation to Environmental Rearing Conditions.” *Journal of Shellfish Research*

- 771 24 (1): 197–207. [http://dx.doi.org/10.2983/0730-8000\(2005\)24\[197:SMOCGT\]2.0.CO;2](http://dx.doi.org/10.2983/0730-8000(2005)24[197:SMOCGT]2.0.CO;2)
- 772 Solomieu Barbosa, Valerie, Tristan Renault and Marie-Agnes Traves. 2015. “Mass mortality in bivalves  
773 and the intricate case of the Pacific Oyster, *Crassostrea gigas*.” *Journal of Invertebrate Pathology*  
774 131: 2-10. <https://doi.org/10.1016/j.jip.2015.07.011>.
- 775 Stevick, Rebecca J., Saebom Sohn, Tejashree H. Modak, David R. Nelson, David C. Rowley, Karin  
776 Tammi, Roxanna Smolowitz, Kathryn Markey Lundgren, Anton F. Post, and Marta Gómez-Chiarri.  
777 2019. “Bacterial Community Dynamics in an Oyster Hatchery in Response to Probiotic Treatment.”  
778 *Frontiers in Microbiology* 10 (MAY): 1–13. <https://doi.org/10.3389/fmicb.2019.01060>.
- 779 Steward, Grieg F, Alexander I Culley, Jaclyn A Mueller, Elisha M Wood-Charlson, Mahdi Belcaid, and  
780 Guylaine Poisson. 2013. “Are We Missing Half of the Viruses in the Ocean ?” *The ISME Journal* 7:  
781 672–79. <https://doi.org/10.1038/ismej.2012.121>.
- 782 Sun, D, and L Hallin. 2018. “British Columbia’s Fisheries and Aquaculture Sector, 2016 Edition.”
- 783 Sunagawa, Shinichi, Luis Pedro Coelho, Samuel Chaffron, Jens Roat Kultima, Karine Labadie, Guillem  
784 Salazar, Bardya Djahanschiri, et al. 2015. “Structure and Function of the Global Ocean  
785 Microbiome.” *Science* 348 (6237): 1–10. <https://doi.org/10.1126/science.1261359>.
- 786 Sutherland, B. J. G., Rycroft, C., Ferchaud, A.-L., Saunders, R., Li, L., Liu, S., Chan, A. M., Otto, S. P.,  
787 Suttle, C. A., & Miller, K. M. (2020). Relative genomic impacts of translocation history, hatchery  
788 practices, and farm selection in Pacific oyster *Crassostrea gigas* throughout the Northern  
789 Hemisphere. *Evolutionary Applications*, 13(6), 1380-1399. doi:10.1111/eva.12965
- 790 Tai, V, B Palenik. 2009. “Temporal variation of Synechococcus clades at a coastal Pacific Ocean  
791 monitoring site.” *ISME Journal*. 3 (8): 903-915. <https://doi.org/10.1038/ismej.2009.35>.
- 792 Thomson, Paul G, Andrew T Davidson, and Lynsey Maher. 2016. “Increasing CO 2 Changes Community  
793 Composition of Pico- and Nano-Sized Protists and Prokaryotes at a Coastal Antarctic Site” *MEPS*  
794 554: 51–69. <https://doi.org/10.3354/meps11803>.
- 795 Trabal, Natalia, José M Mazón-suástegui, Ricardo Vázquez-juárez, Felipe Asencio-valle, Enrique  
796 Morales-bojórquez, and Jaime Romero. 2012. “Molecular Analysis of Bacterial Microbiota  
797 Associated with Oysters (*Crassostrea Gigas* and *Crassostrea Cortezensis*) in Different Growth  
798 Phases at Two Cultivation Sites.” *Microb Ecol* 64: 555–69. <https://doi.org/10.1007/s00248-012-0039-5>.
- 800 Tsai, A. Y., G. C. Gong, and J. Hung. 2013. “Seasonal Variations of Virus-and Nanoflagellate-Mediated  
801 Mortality of Heterotrophic Bacteria in the Coastal Ecosystem of Subtropical Western Pacific.”  
802 *Biogeosciences* 10 (5): 3055–65. <https://doi.org/10.5194/bg-10-3055-2013>.
- 803 VanEtten, J L, M V Graves, W Boland, and N Delaroque. 2002. “Phycodnaviridae – Large DNA Algal  
804 Viruses.” *Archives of Virology* 147: 1479–1516. <https://doi.org/10.1007/s00705-002-0822-6>.
- 805 VanEtten, J L, L C Lane, and D D Dunigan. 2010. “DNA Viruses: The Really Big Ones (Giruses).” *Annu*  
806 *Rev Microbiol* 64: 83–99. <https://doi.org/10.1146/annurev.micro.112408.134338>.DNA.
- 807 VanEtten, J L, R H Meints, D Kuczmariski, D E Burbank, and K Lee. 1982. “Viruses of Symbiotic  
808 Chlorella-like Algae Isolated from Paramecium Bursaria and Hydra Viridis.” *Proceedings of the*  
809 *National Academy of Sciences* 79 (12): 3867–71. <https://doi.org/10.1073/pnas.79.12.3867>.
- 810 Wang, Qing, Ruiwen Cao, Xuanxuan Ning, Liping You, Changkao Mu, Chunlin Wang, Lei Wei, Ming  
811 Cong, Huifeng Wu, and Jianmin Zhao. 2016. “Effects of Ocean Acidification on Immune Responses  
812 of the Pacific Oyster *Crassostrea Gigas*.” *Fish and Shellfish Immunology* 49: 24–33.  
813 <https://doi.org/10.1016/j.fsi.2015.12.025>.
- 814 Wegner, Karl Mathias, Nils Volkenborn, Hannes Peter, and Alexander Eiler. 2013. “Disturbance Induced  
815 Decoupling between Host Genetics and Composition of the Associated Microbiome.” *BMC*  
816 *Microbiology* 13 (1). <https://doi.org/10.1186/1471-2180-13-252>.
- 817 Weinbauer, Markus G., and Fereidoun Rassoulzadegan. 2004. “Are Viruses Driving Microbial  
818 Diversification and Diversity?” *Environmental Microbiology* 6 (1): 1–11.  
819 <https://doi.org/10.1046/j.1462-2920.2003.00539.x>.
- 820 Wigington, Charles H, Derek Sonderegger, Corina P D Brussaard, Alison Buchan, Jan F Finke, Jed A  
821 Fuhrman, Jay T Lennon, et al. 2016. “Marine Virus and Microbial Cell Abundances.” *Nature*

- 822 *Microbiology*, no. January: 4–11. <https://doi.org/10.1038/nmicrobiol.2015.24>.
- 823 Worden, Alexandra Z, Jessica K Nolan, and Brian Palenik. 2004. “Assessing the Dynamics and Ecology  
824 of Marine Picophytoplankton : The Importance of the Eukaryotic Component.” *Limnology and*  
825 *Oceanography* 49 (1): 168–79. <https://doi.org/10.4319/lo.2004.49.1.0168>
- 826 Yu, Shu Xian, Yun Long Pang, Yin Chu Wang, Jia Lin Li, and Song Qin. 2018. “Distribution of Bacterial  
827 Communities along the Spatial and Environmental Gradients from Bohai Sea to Northern Yellow  
828 Sea.” *PeerJ* 2018 (1): 1–21. <https://doi.org/10.7717/peerj.4272>.
- 829 Yung, Cheuk Man, Christopher S. Ward, Katherine M. Davis, Zackary I. Johnson, and Dana E. Hunt.  
830 2016. “Insensitivity of Diverse and Temporally Variable Particle-Associated Microbial  
831 Communities to Bulk Seawater Environmental Parameters.” *Applied and Environmental*  
832 *Microbiology* 82 (11): 3431–37. <https://doi.org/10.1128/AEM.00395-16>.
- 833 Zhang, Linlin, Li Li, Ximing Guo, Gary W. Litman, Larry J. Dishaw, and Guofan Zhang. 2015. “Massive  
834 Expansion and Functional Divergence of Innate Immune Genes in a Protostome.” *Scientific Reports*  
835 5: 1–11. <https://doi.org/10.1038/srep08693>.
- 836 Zhao, Xuelin, Hong Yu, Lingfeng Kong, and Qi Li. 2012. “Transcriptomic Responses to Salinity Stress in  
837 the Pacific Oyster *Crassostrea Gigas*.” *PLoS ONE* 7 (9).  
838 <https://doi.org/10.1371/journal.pone.0046244>.
- 839

840 **Tables**

841

842 **Table 1. Summary statistics of ocean chemistry variables.** pCO<sub>2</sub> was the target abiotic variable of the  
843 study, but the effect of the other variables was also considered in the context of metatranscriptome  
844 profiles. For calcite and aragonite, the saturation states are shown.

|                        | <b>Min</b> | <b>Max</b> | <b>Mean</b> | <b>Median</b> | <b>Std. dev.</b> |
|------------------------|------------|------------|-------------|---------------|------------------|
| pH                     | 7.56       | 8.35       | 7.8         | 7.78          | 0.22             |
| Temperature (°C)       | 11.4       | 16.7       | 14.4        | 14            | 1.5              |
| Salinity (‰)           | 28         | 29         | 28.2        | 28            | 0.41             |
| Alkalinity (μmol/kg)   | 795.1      | 2634.2     | 1501.1      | 1400          | 465.1            |
| Aragonite (Ω)          | 0.34       | 2.72       | 0.93        | 0.65          | 0.69             |
| Calcite (Ω)            | 0.54       | 3.15       | 1.39        | 1.04          | 0.86             |
| pCO <sub>2</sub> (ppm) | 81.2       | 1059.9     | 588.3       | 606.6         | 289.9            |

845



846 **Table 2. Top ten significant genera of linear models against low, medium, and high pCO<sub>2</sub>**  
 847 **concentration and T-test of early vs. late summer.** P-values express the model significance, slope and  
 848 statistic values indicate positive and negative correlations.

| Linear model genus vs. pCO <sub>2</sub> |         |           |        |                           |                          |                        |                  |
|-----------------------------------------|---------|-----------|--------|---------------------------|--------------------------|------------------------|------------------|
| R2                                      | P-value | Intercept | Slope  | Genus                     | Order                    | Phylum                 | Superkingdom     |
| 0.718                                   | <0.001  | 0.582     | 0.001  | <i>Methyloceanibacter</i> | <i>Rhizobiales</i>       | <i>Proteobacteria</i>  | <i>Bacteria</i>  |
| 0.597                                   | <0.001  | 2.157     | -0.002 | <i>Deferribacter</i>      | <i>Deferribacterales</i> | <i>Deferribacteres</i> | <i>Bacteria</i>  |
| 0.552                                   | <0.001  | 2.229     | -0.001 | <i>Gossypium</i>          | <i>Malvales</i>          | <i>Streptophyta</i>    | <i>Eukaryota</i> |
| 0.614                                   | 0.001   | 1.956     | -0.002 | <i>Thioalkalivibrio</i>   | <i>Chromatiales</i>      | <i>Proteobacteria</i>  | <i>Bacteria</i>  |
| 0.694                                   | 0.001   | 2.902     | -0.002 | <i>Mitrocomella</i>       | <i>Leptothecata</i>      | <i>Cnidaria</i>        | <i>Eukaryota</i> |
| 0.466                                   | 0.001   | 2.234     | -0.002 | <i>Sogarnavirus</i>       | <i>Picornavirales</i>    | <i>Pisuviricota</i>    | <i>Viruses</i>   |
| 0.460                                   | 0.001   | 2.320     | -0.001 | <i>Methylovorus</i>       | <i>Nitrosomonadales</i>  | <i>Proteobacteria</i>  | <i>Bacteria</i>  |
| 0.447                                   | 0.001   | 2.644     | -0.001 | <i>Methylophilus</i>      | <i>Nitrosomonadales</i>  | <i>Proteobacteria</i>  | <i>Bacteria</i>  |
| 0.462                                   | 0.001   | 1.712     | -0.001 | <i>Aeromonas</i>          | <i>Aeromonadales</i>     | <i>Proteobacteria</i>  | <i>Bacteria</i>  |
| 0.470                                   | 0.002   | 0.525     | 0.001  | <i>Steinhofvirus</i>      | <i>Caudovirales</i>      | <i>Uroviricota</i>     | <i>Viruses</i>   |

| T-test genus vs. early and late summer |         |           |        |                       |                        |                       |                  |
|----------------------------------------|---------|-----------|--------|-----------------------|------------------------|-----------------------|------------------|
| Statistic                              | P-value | Parameter | Stderr | Genus                 | Order                  | Phylum                | Superkingdom     |
| 7.053                                  | 0.000   | 13.653    | 0.121  | <i>Coregonus</i>      | <i>Salmoniformes</i>   | <i>Chordata</i>       | <i>Eukaryota</i> |
| 6.884                                  | 0.000   | 11.777    | 0.118  | <i>Biomphalaria</i>   |                        | <i>Mollusca</i>       | <i>Eukaryota</i> |
| 4.129                                  | 0.001   | 15.288    | 0.169  | <i>Leucotheavirus</i> | <i>Caudovirales</i>    | <i>Uroviricota</i>    | <i>Viruses</i>   |
| 3.759                                  | 0.004   | 9.647     | 0.207  | <i>Nesterenkonia</i>  | <i>Micrococcales</i>   | <i>Actinobacteria</i> | <i>Bacteria</i>  |
| 3.713                                  | 0.002   | 16.922    | 0.217  | <i>Glaciecola</i>     | <i>Alteromonadales</i> | <i>Proteobacteria</i> | <i>Bacteria</i>  |
| 3.693                                  | 0.002   | 13.866    | 0.164  | <i>Emcibacter</i>     | <i>Emcibacterales</i>  | <i>Proteobacteria</i> | <i>Bacteria</i>  |
| 3.614                                  | 0.002   | 15.826    | 0.125  | <i>Glaesserella</i>   | <i>Pasteurellales</i>  | <i>Proteobacteria</i> | <i>Bacteria</i>  |
| 3.566                                  | 0.004   | 10.998    | 0.217  | <i>Nephromyces</i>    | <i>Nephromycida</i>    | <i>Apicomplexa</i>    | <i>Eukaryota</i> |
| 3.560                                  | 0.006   | 9.414     | 0.194  | <i>Tannerella</i>     | <i>Bacteroidales</i>   | <i>Bacteroidetes</i>  | <i>Bacteria</i>  |
| 3.221                                  | 0.006   | 14.866    | 0.112  | <i>Borrelia</i>       | <i>Spirochaetales</i>  | <i>Spirochaetes</i>   | <i>Bacteria</i>  |

849

850 **Table 3. Gene Ontology (GO) enrichment for pCO<sub>2</sub> and season.** GO enrichment analysis indicates the  
 851 effect of pCO<sub>2</sub> and season on several biological processes, most notably a highly significant enrichment  
 852 for viral processes in the late season. Columns shown are the GO Term, count in gene list, p-value for  
 853 enrichment test, count in background list, and fold enrichment. Full GO enrichment results are presented  
 854 in Supplemental Materials.

|                                              | <b>GO Term</b>                                   | <b>Count</b> | <b>P-value</b> | <b>Count<br/>(background)</b> | <b>Fold<br/>Enrich.</b> |
|----------------------------------------------|--------------------------------------------------|--------------|----------------|-------------------------------|-------------------------|
| <b>Overexpr. in<br/>high pCO<sub>2</sub></b> | GO:0009236~cobalamin<br>biosynthetic process     | 5            | 0.0030         | 18                            | 7.9                     |
|                                              | GO:0006260~DNA replication                       | 17           | 0.0048         | 226                           | 2.1                     |
|                                              | GO:0019058~viral life cycle                      | 8            | 0.015          | 75                            | 3.0                     |
|                                              | GO:0039693~viral DNA<br>genome replication       | 4            | 0.020          | 17                            | 6.7                     |
| <b>Overexpr. in<br/>low pCO<sub>2</sub></b>  | GO:0051604~protein<br>maturation                 | 6            | 6.1E-06        | 30                            | 21.0                    |
|                                              | GO:0006950~response to<br>stress                 | 10           | 0.0032         | 344                           | 3.1                     |
|                                              | GO:0006457~protein folding                       | 5            | 0.0067         | 83                            | 6.3                     |
| <b>Overexpr. in<br/>early season</b>         | GO:0003735~structural<br>constituent of ribosome | 8            | 0.0059         | 134                           | 3.6                     |
| <b>Overexpr. in<br/>late season</b>          | GO:0016032~viral process                         | 53           | 7.3E-42        | 91                            | 9.7                     |
|                                              | GO:0006260~DNA replication                       | 55           | 1.8E-20        | 226                           | 4.1                     |
|                                              | GO:0051701~interaction with<br>host              | 23           | 5.1E-16        | 45                            | 8.5                     |
|                                              | GO:0046718~viral entry into<br>host cell         | 17           | 1.2E-13        | 27                            | 10.5                    |

855

856 **Figures**

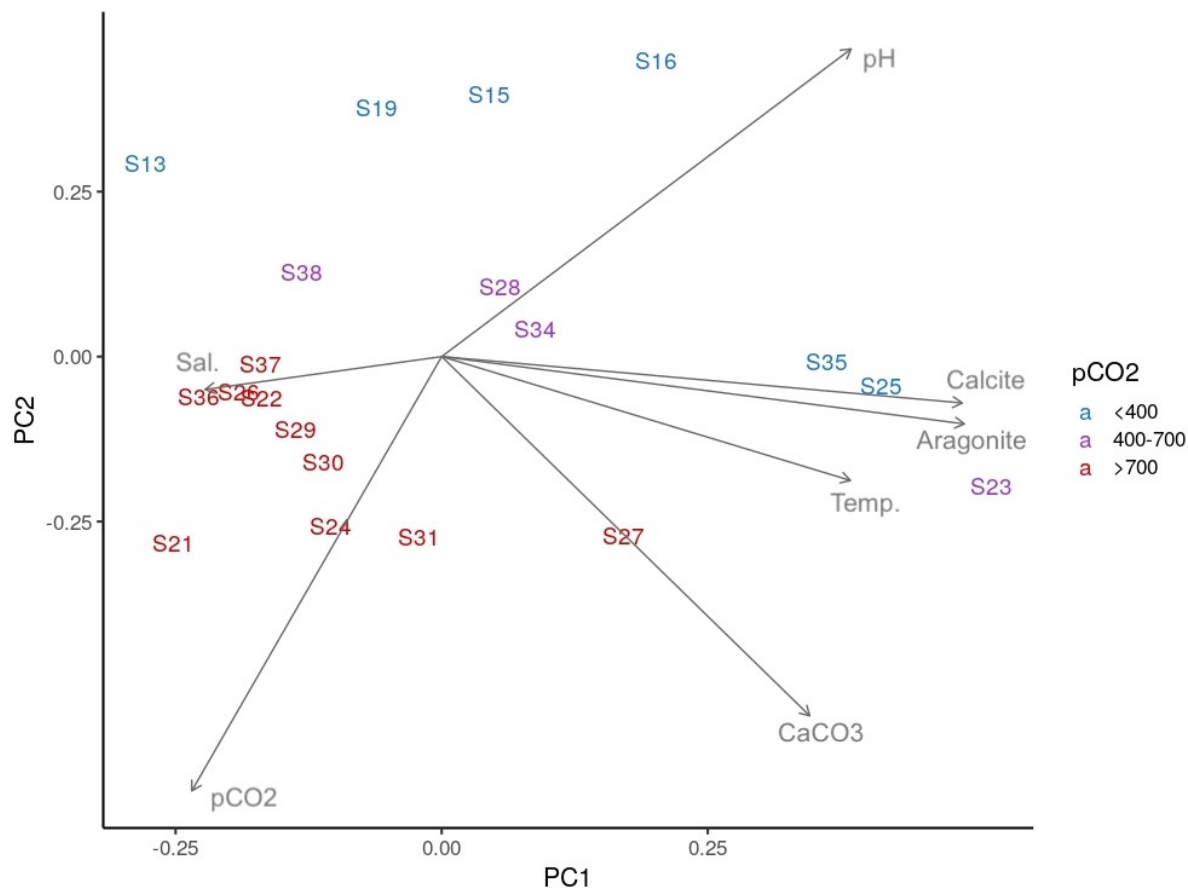

857

858 **Figure 1. Principal Components Analysis (PCA) of samples based on environmental conditions.**

859 Samples are indicated as labels, their corresponding pCO<sub>2</sub> classification is indicated by colour (blue=low,  
860 violet=medium, red=high). Arrow direction and length indicate the relative effect and strength of  
861 environmental variables. Here the positions of samples are entirely from environmental conditions, not  
862 based on taxonomic or gene expression data.

863

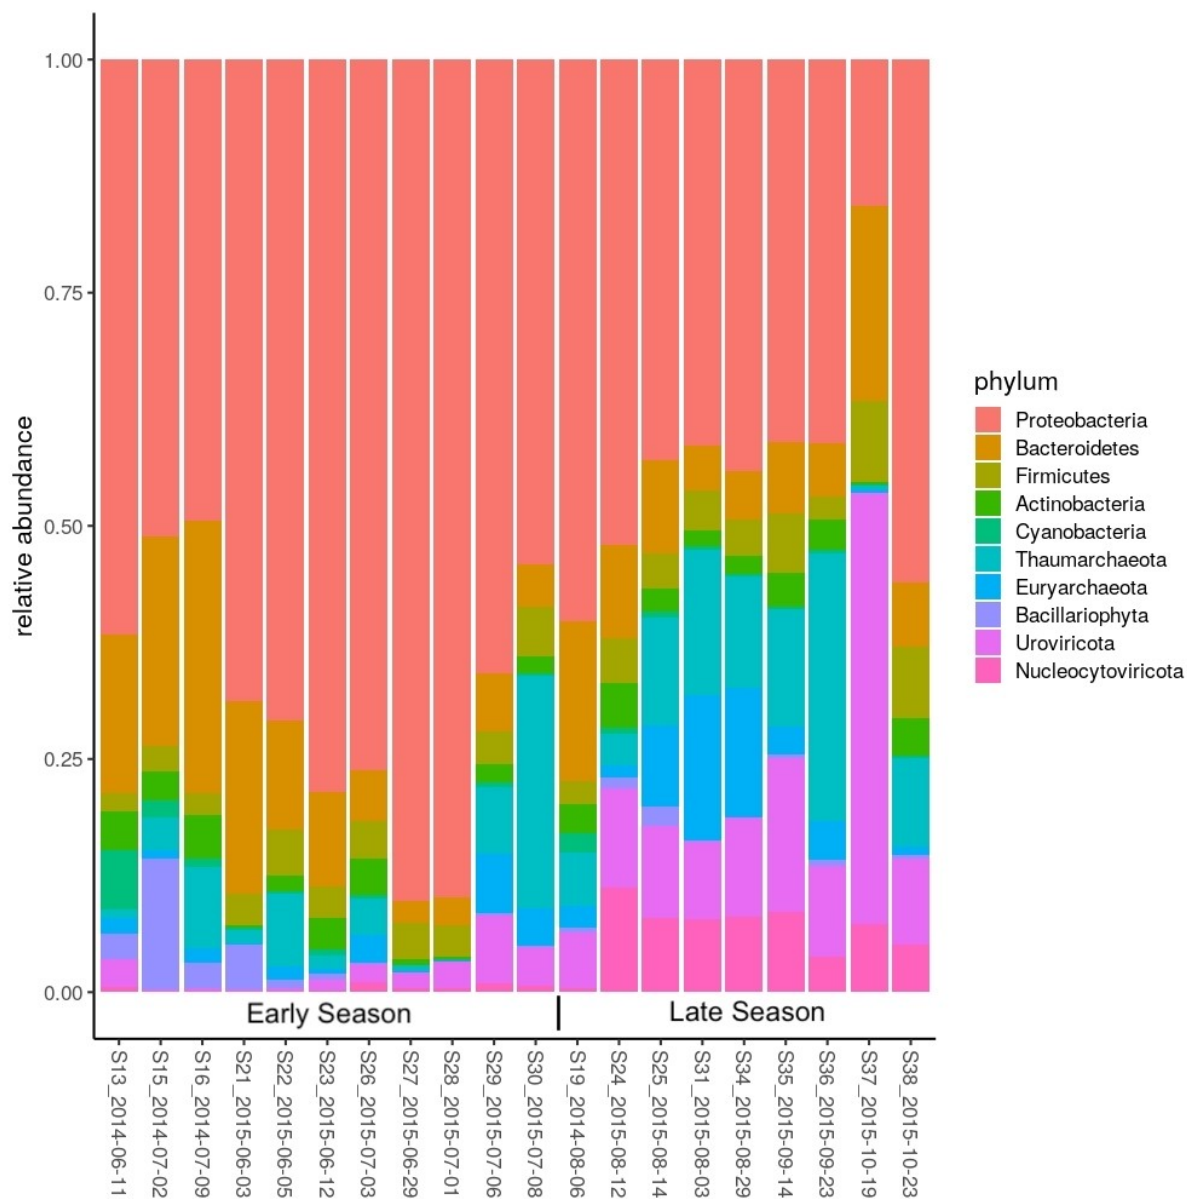

864

865 **Figure 2. Community composition of the top 10 phyla across samples.** Stacked bar-plot of the relative  
866 abundance (total number of alignments to taxa) across samples for microbial phyla above 0.5% total  
867 abundance, phyla are indicated by color coding in legend, samples are arranged by early season vs. late  
868 season.

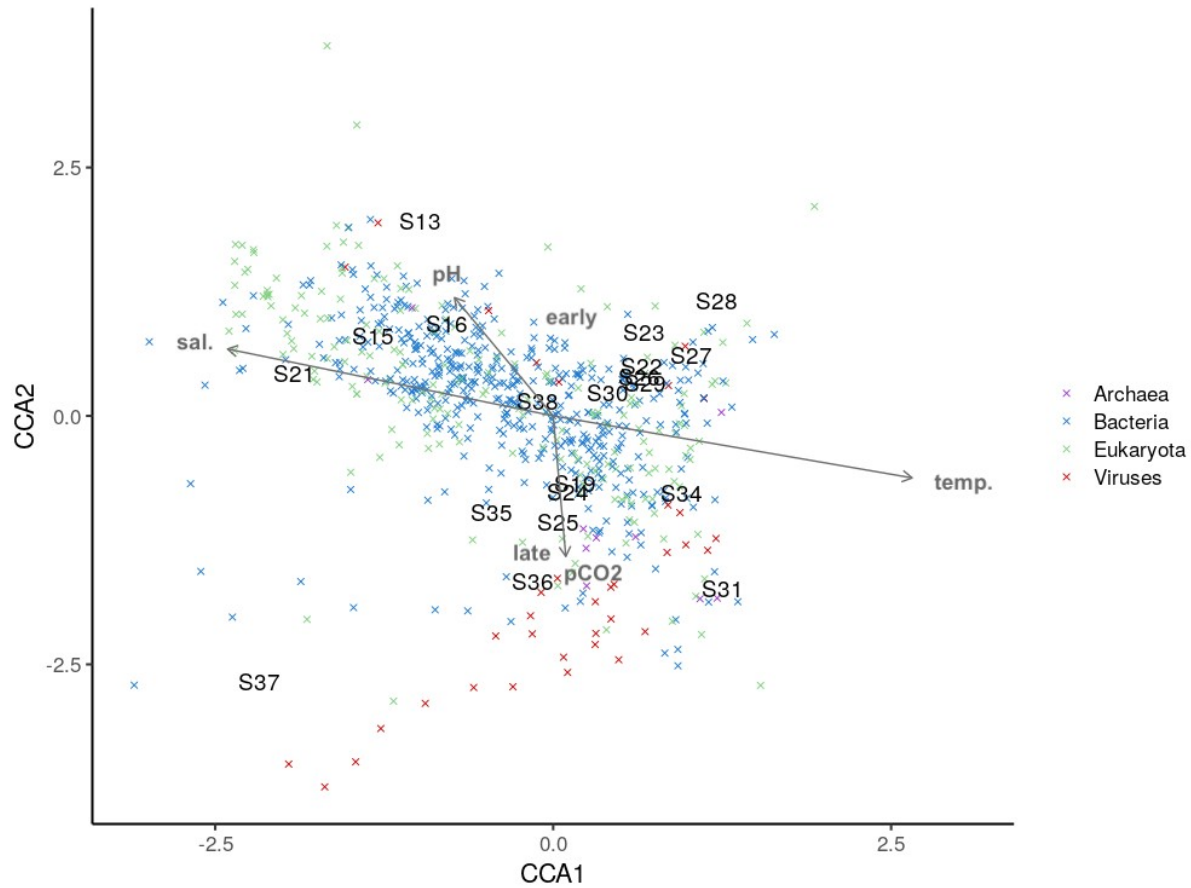

869

870 **Figure 3. Canonical correspondence analysis (CCA) showing the effect of environmental variables**  
871 **on the variation in relative abundance of genera among samples.** Samples are shown as labels and the  
872 relative association of genera is shown as crosses. Crosses for genera are color coded by their  
873 corresponding superkingdom. The effect of environmental variables on the composition of genera in the  
874 samples is indicated by grey arrows, the arrow length corresponds to scaled effect strength. The effect of  
875 early and late summer is indicated in grey labels.

876

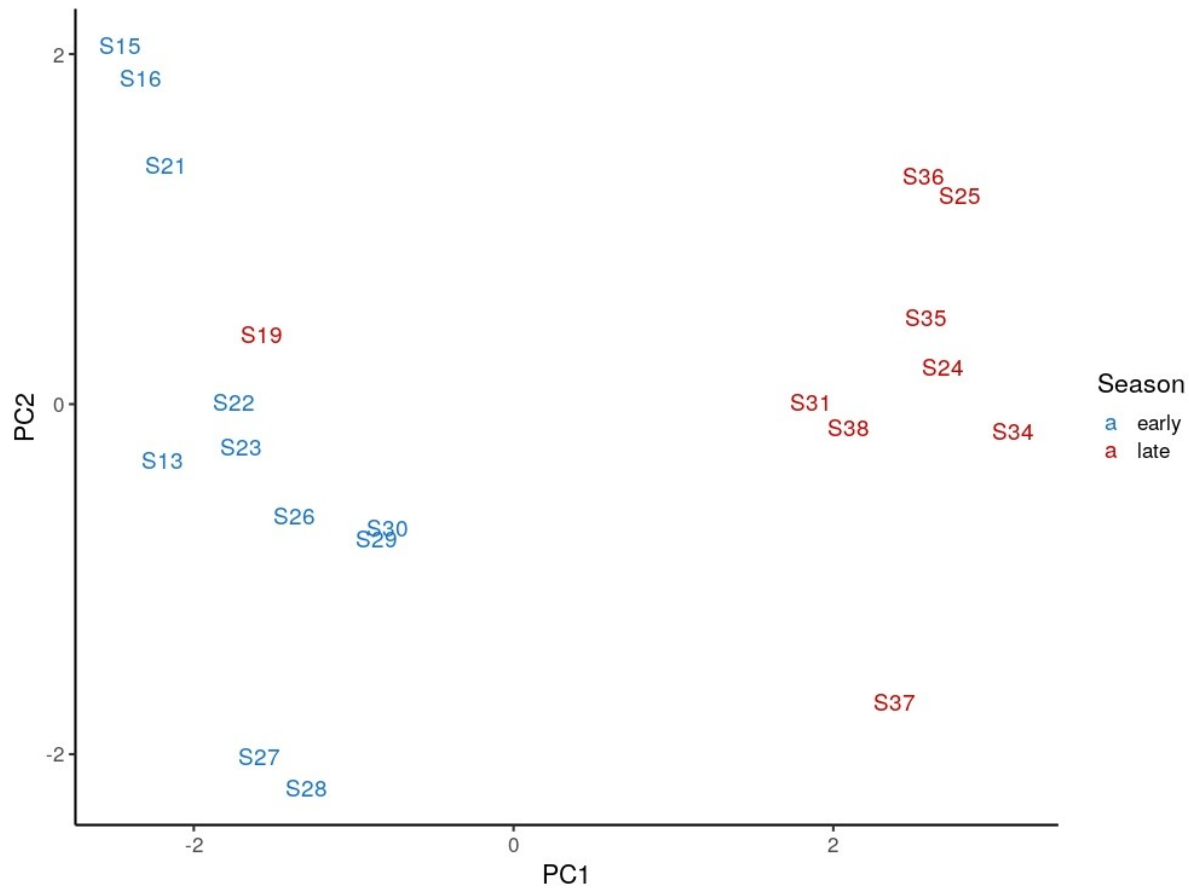

877

878 **Figure 4. Unsupervised multidimensional scaling (MDS) plot on samples based on gene expression.**

879 Dimension 1 explains the most variation, separating the late and early season samples. Samples are  
880 labeled by sample number and the pCO<sub>2</sub> level measured during the sampling. Samples S13, S15, S16, and  
881 S19 are from 2014, and the rest are from 2015. Full details on samples can be viewed in Supplemental  
882 File S1.

883 **Supplementary Materials**

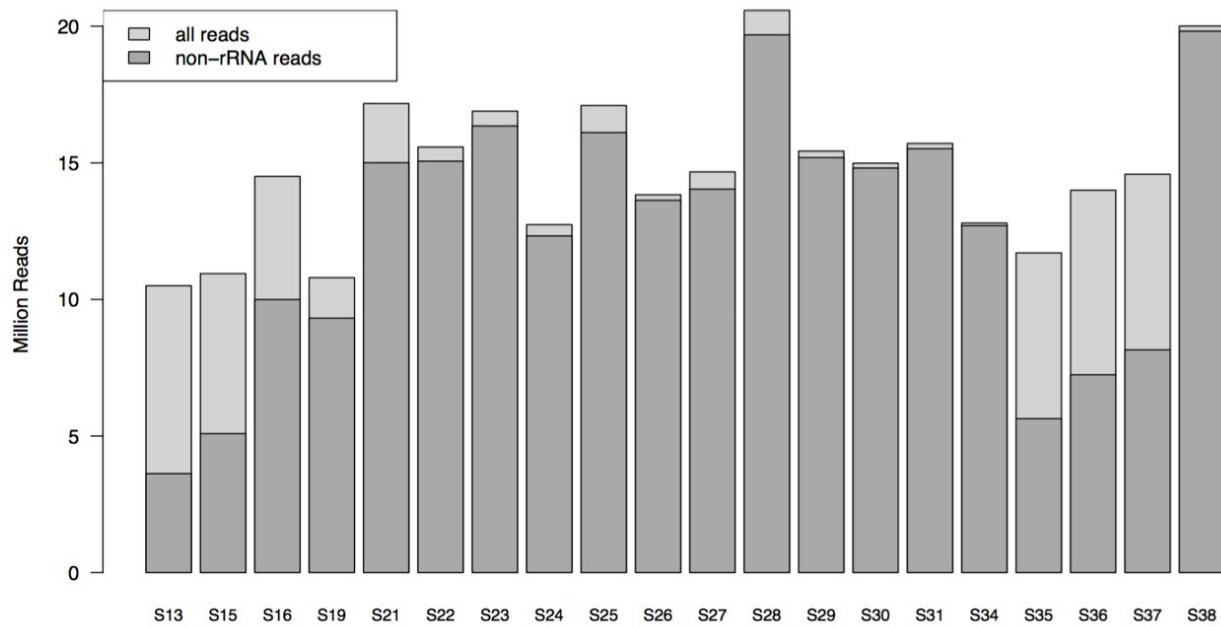

884

885 **Supplemental Figure 1. Proportion of non-rRNA and rRNA reads per sample.** Results indicate that  
886 for a majority of the samples, the rRNA depletion was successful, enriching the amount of messenger  
887 RNA for analysis.

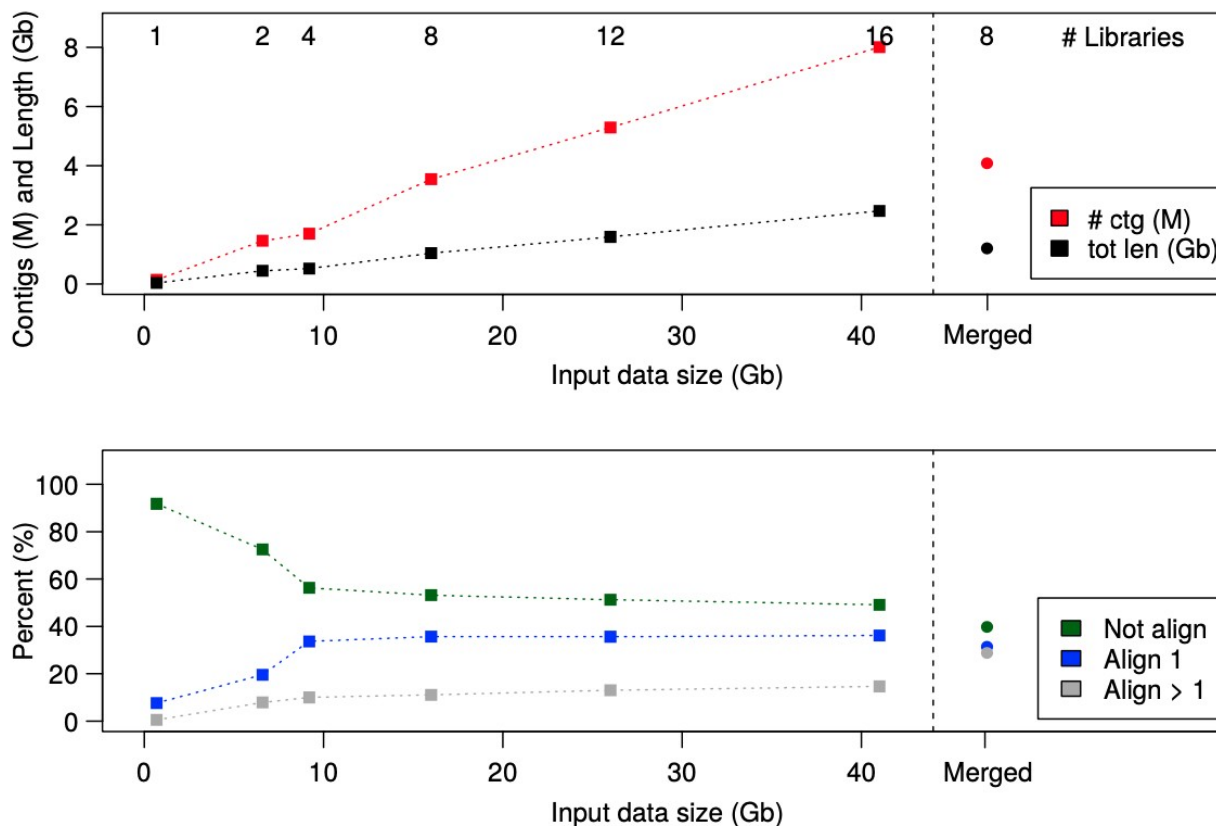

889 **Supplemental Figure 2. Assessment of reference metatranscriptome assemblies.** (A) Total contig  
890 numbers (red) increase with input data size linearly, and so does total length of output assembly (black).  
891 The individual assembly of eight libraries that were subsequently merged together (shown to the right of  
892 the hatched line) has a similar number of contigs and length as the eight libraries assembled  
893 simultaneously. (B) The percentage of unaligned reads decreases as more libraries are added, initially  
894 with a rapid decrease until four libraries are added, and then with a more gentle slope as additional  
895 libraries are added. The benefit of increasing from eight to 16 libraries is not as evident in the percentage  
896 of reads aligned, suggesting that once four or eight libraries are assembled together, not much benefit is  
897 added by increasing the number of libraries in this dataset. Interestingly, the merged assembly has slightly  
898 fewer unaligned reads, but double the number of multi-mapping reads (align > 1, grey), indicating a  
899 strong amount of redundancy is still present in the merged assembly that is not present in the 16 library  
900 simultaneous assembly.



901 **Supplemental Data**

902 **Supplemental File S1.** Complete environmental and metadata for all samples.

903

904 **Supplemental File S2.** Overview of lineage data assigned to contigs.

905

906 **Supplemental File S3.** Full list of genera with significant linear models to pCO<sub>2</sub> concentrations.

907

908 **Supplemental File S4.** Full list of genera with significant different abundances between early and late  
909 summer samples.

910

911 **Supplemental File S5.** Full differential gene expression analysis including genes differentially expressed  
912 between pCO<sub>2</sub> levels and between seasons, as well as genes found in both comparisons.

913

914 **Supplemental File S6.** Full Gene Ontology analysis including GO enrichment for each differentially  
915 expressed gene list for Biological Process (BP), Cellular Component (CC), and Molecular Function (MF).  
916 Viral transcripts identified in BP in the season differential analysis are also included.
